# Supplementary material for: New N-Substituted-1,2,4-triazole Derivatives of Pyrrolo[3,4-d]pyridazinone with Significant Anti-Inflammatory Activity—Design, Synthesis and Complementary In Vitro, Computational and Spectroscopic Studies
Source: MDPI journal article supplement (doi:10.3390/ijms222011235), 2021-10-18

## **SUPPLEMENTARY DATA**

### **New *N*-substituted-1,2,4-triazole Derivatives of Pyrrolo[3,4-*d*]pyridazinone with Significant Anti-Inflammatory Activity - Design, Synthesis and Complementary *In Vitro*, Computational and Spectroscopic Studies**

**Łukasz Szczukowski<sup>1,\*</sup>, Edward Krzyżak<sup>2</sup>, Benita Wiatrak<sup>3</sup>, Paulina Jawień<sup>3</sup>, Aleksandra Marciniak<sup>2</sup>, Aleksandra Kotynia<sup>2</sup>, Piotr Świątek<sup>1,\*</sup>**

<sup>1</sup> Department of Medicinal Chemistry, Wrocław Medical University, Borowska 211, 50-556 Wrocław, Poland

<sup>2</sup> Department of Inorganic Chemistry, Wrocław Medical University, Borowska 211a, 50-556, Wrocław, Poland

<sup>3</sup> Department of Pharmacology, Wrocław Medical University, Mikulicza-Radeckiego 2, 50-345 Wrocław, Poland

Correspondence: [lukasz.szczukowski@umed.wroc.pl](mailto:lukasz.szczukowski@umed.wroc.pl); [piotr.swiatek@umed.wroc.pl](mailto:piotr.swiatek@umed.wroc.pl)

### **Table of contents**

|                                                                                                                                                                                          |     |
|------------------------------------------------------------------------------------------------------------------------------------------------------------------------------------------|-----|
| <b>Table S1</b> - Structures of new compounds .....                                                                                                                                      | S2  |
| <b>Table S2</b> - NMR spectra of new compounds .....                                                                                                                                     | S4  |
| <b>Table S3</b> - Mass spectra of new compounds.....                                                                                                                                     | S12 |
| <b>Table S4</b> – FT-IR spectra of new compounds .....                                                                                                                                   | S23 |
| <b>Table S5</b> – Molecular formula strings (CSV) of reported compounds .....                                                                                                            | S32 |
| <b>Table S6</b> – CD spectra of BSA in the absence and presence of all analyzed compounds .....                                                                                          | S33 |
| <b>Table S7</b> - FT-IR spectra - The curve-fitted Amide I region.....                                                                                                                   | S35 |
| <b>Table S8</b> - FT-IR spectra – The changes in Amide I (1650cm <sup>-1</sup> ) and Amide II (1545cm <sup>-1</sup> ) band contribution by BSA interaction with analyzed compounds. .... | S37 |

**Table S1 - Structures of new compounds**

|                                                                                     |                                                                                      |                                                                                       |
|-------------------------------------------------------------------------------------|--------------------------------------------------------------------------------------|---------------------------------------------------------------------------------------|
| 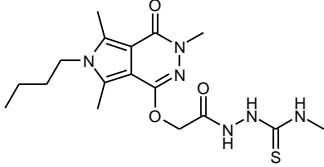   |     |    |
| <b>2a</b>                                                                           | <b>2b</b>                                                                            | <b>2c</b>                                                                             |
|    |     |    |
| <b>3a</b>                                                                           | <b>3b</b>                                                                            | <b>3c</b>                                                                             |
|    |   |   |
| <b>4a</b>                                                                           | <b>4b</b>                                                                            | <b>4c</b>                                                                             |
|  |  |  |
| <b>5a</b>                                                                           | <b>5b</b>                                                                            | <b>5c</b>                                                                             |
|  |  |  |
| <b>6a</b>                                                                           | <b>6b</b>                                                                            | <b>6c</b>                                                                             |
|  |  |  |
| <b>7a</b>                                                                           | <b>7b</b>                                                                            | <b>7c</b>                                                                             |

|                                                                                   |                                                                                    |                                                                                     |
|-----------------------------------------------------------------------------------|------------------------------------------------------------------------------------|-------------------------------------------------------------------------------------|
| 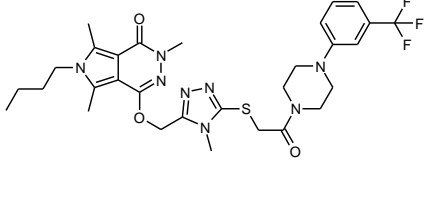 |  |  |
| <b>8a</b>                                                                         | <b>8b</b>                                                                          | <b>8c</b>                                                                           |
|  |  |  |
| <b>9a</b>                                                                         | <b>9b</b>                                                                          | <b>9c</b>                                                                           |

**Table S2 - NMR spectra of new compounds**

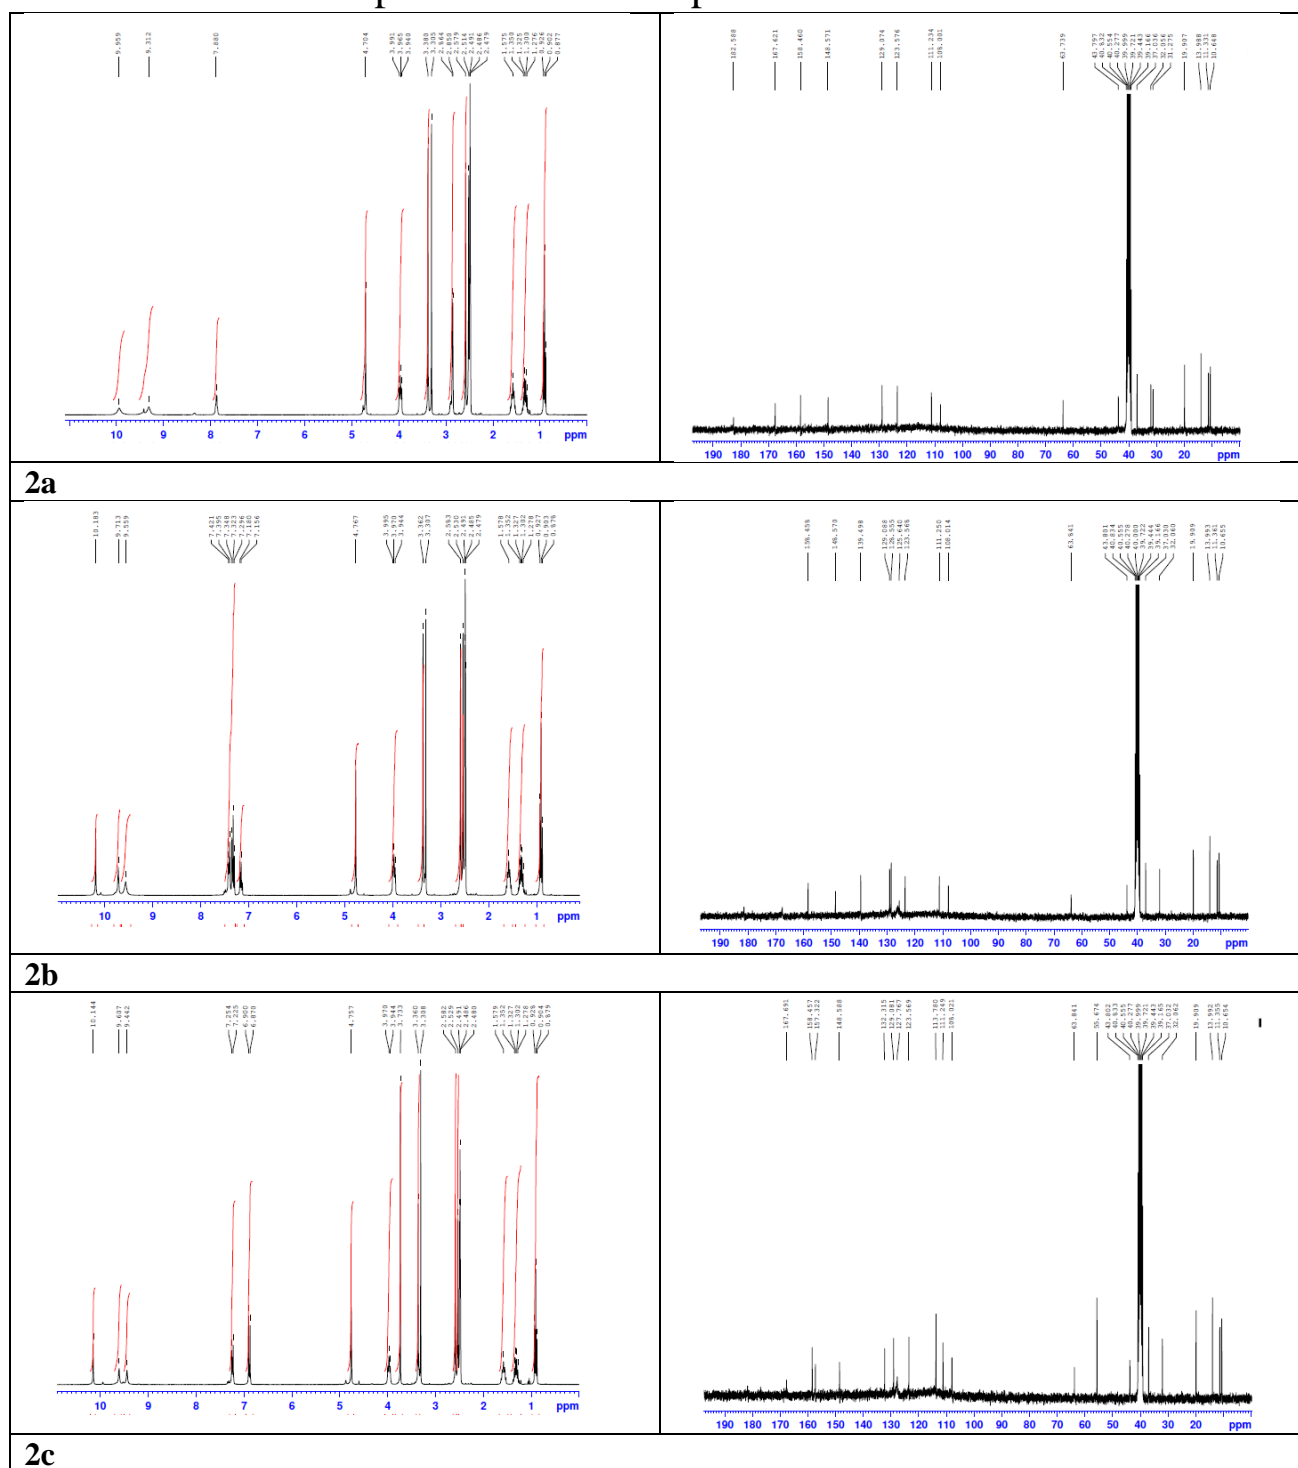



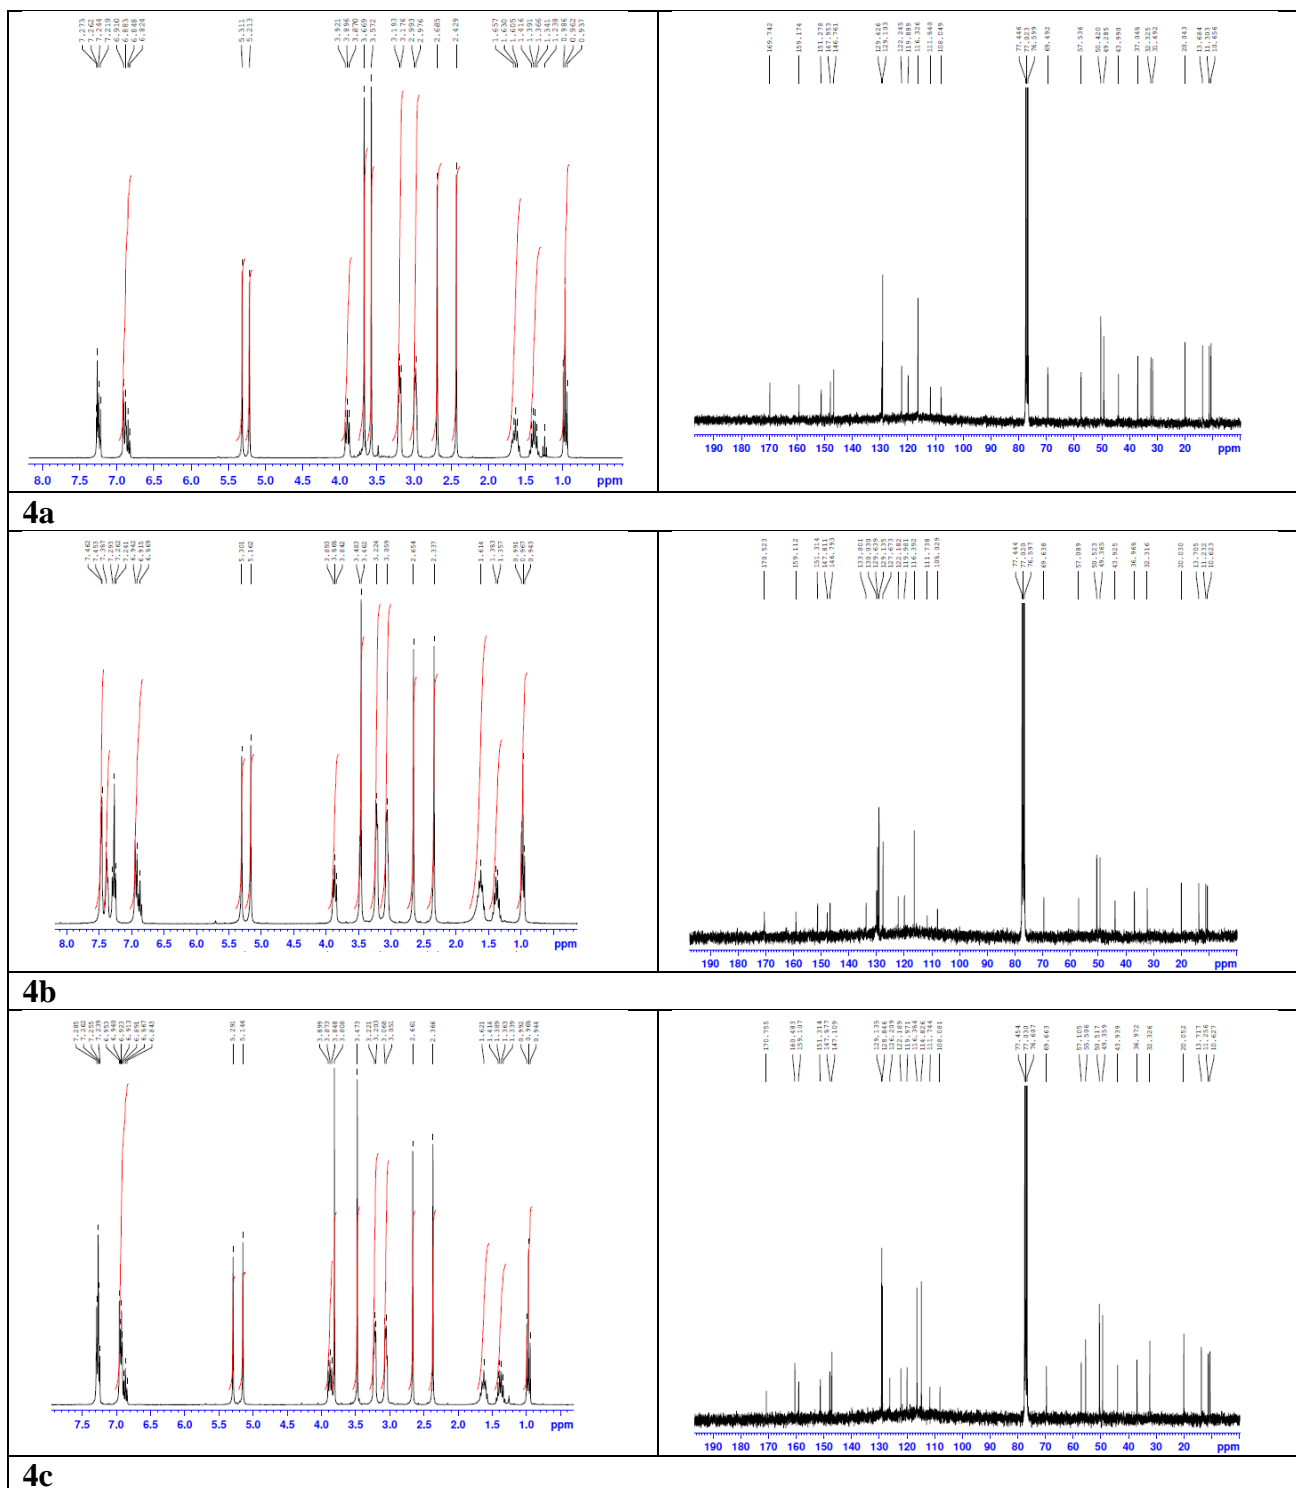

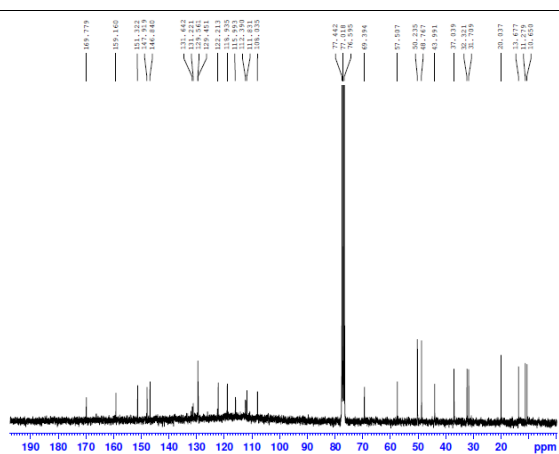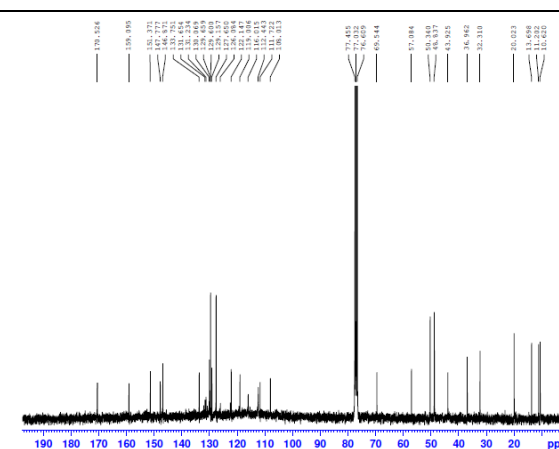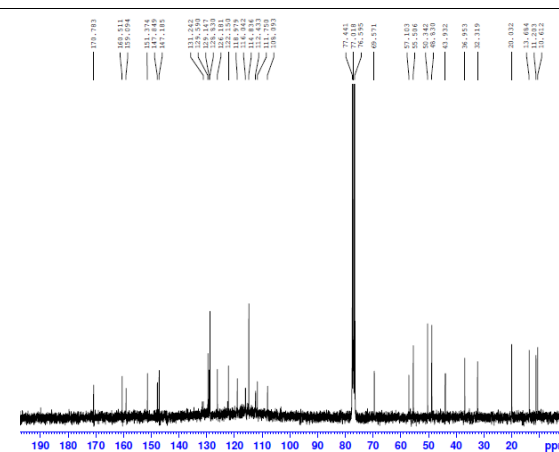

**5c**

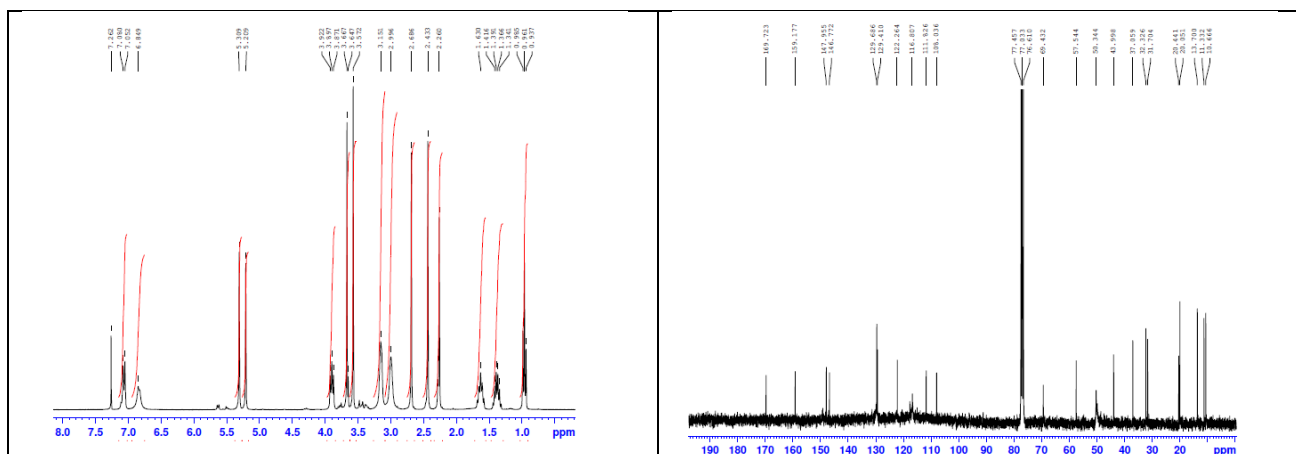



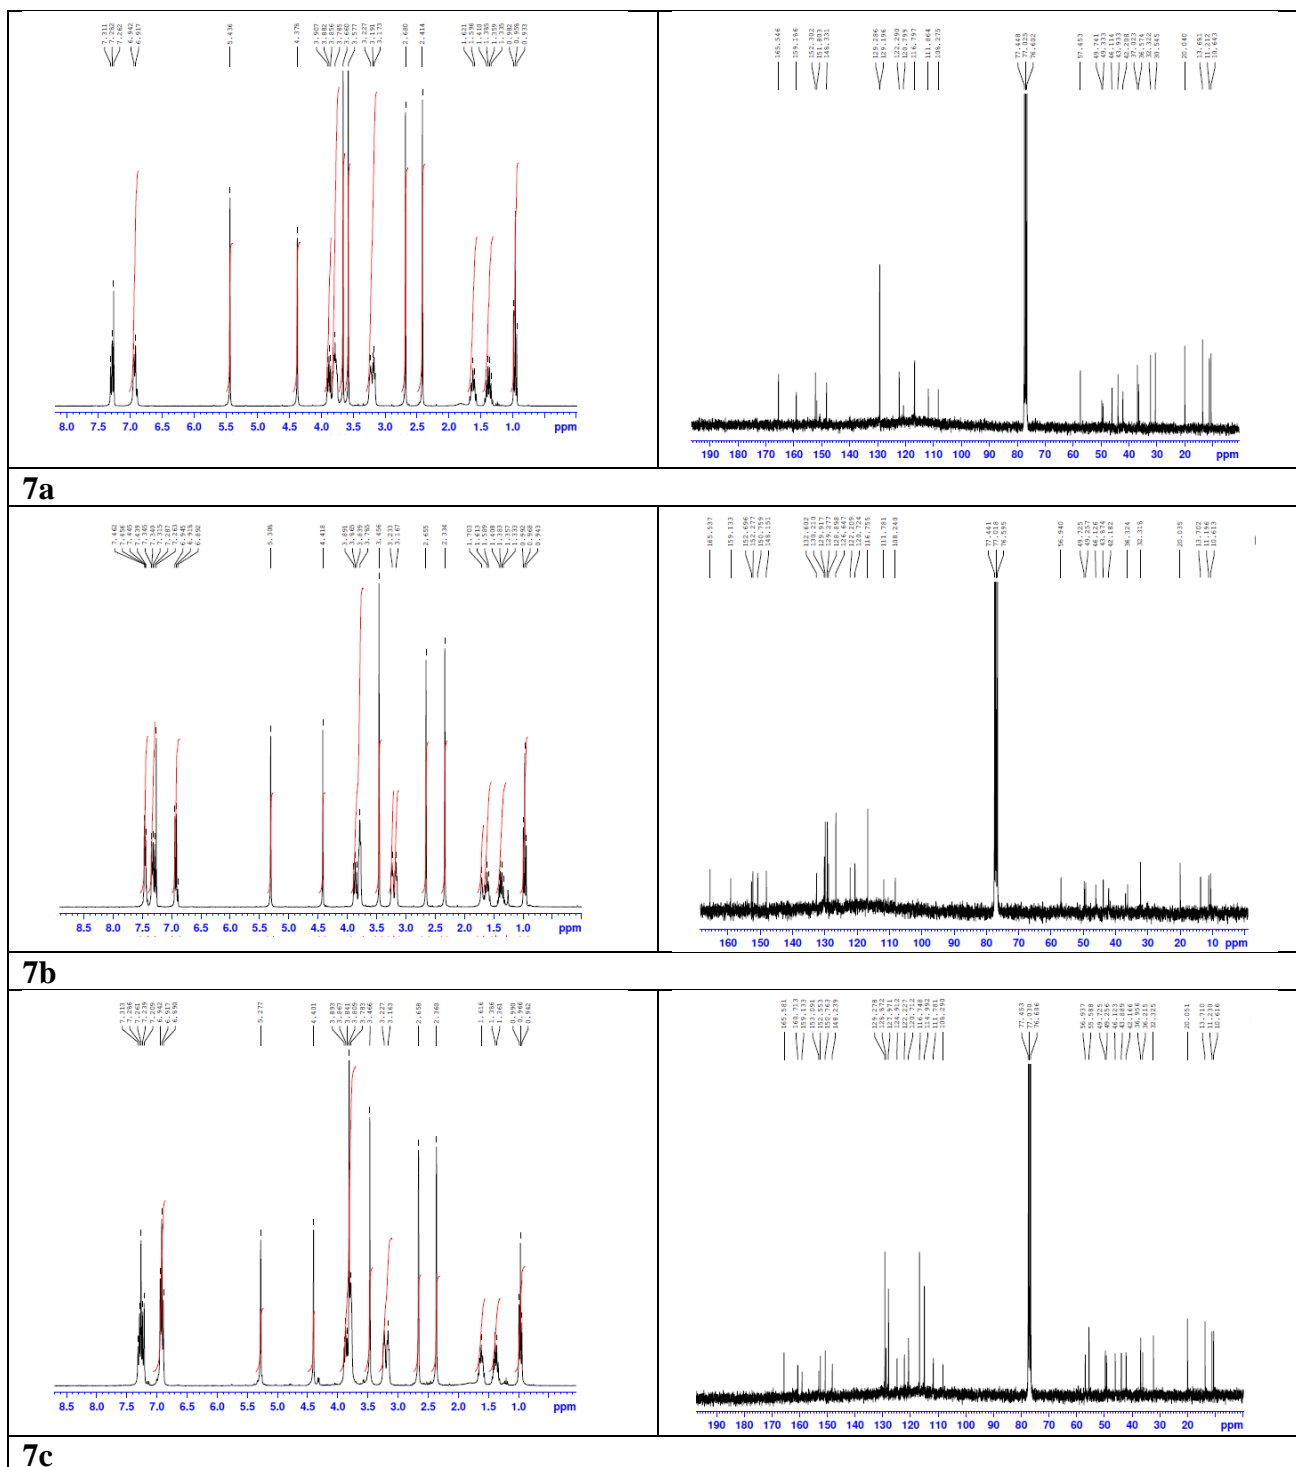

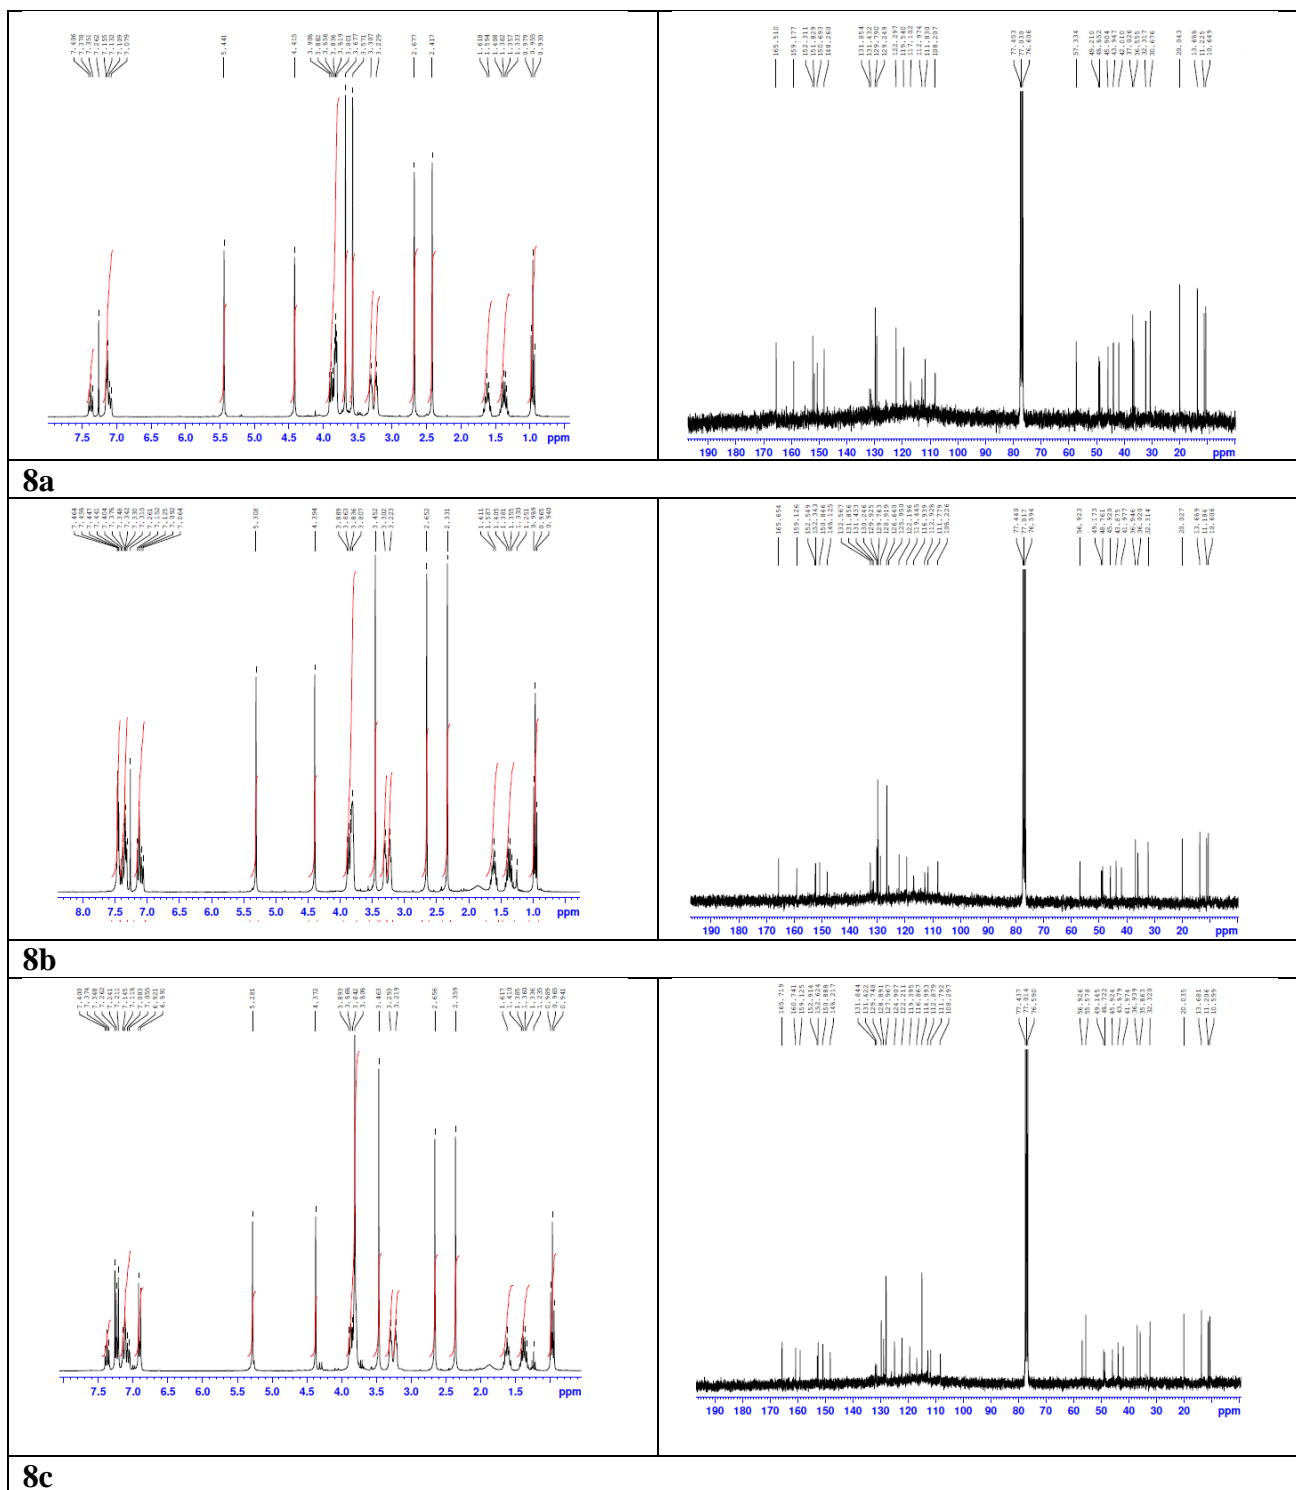



**Table S3** - Mass spectra of new compounds

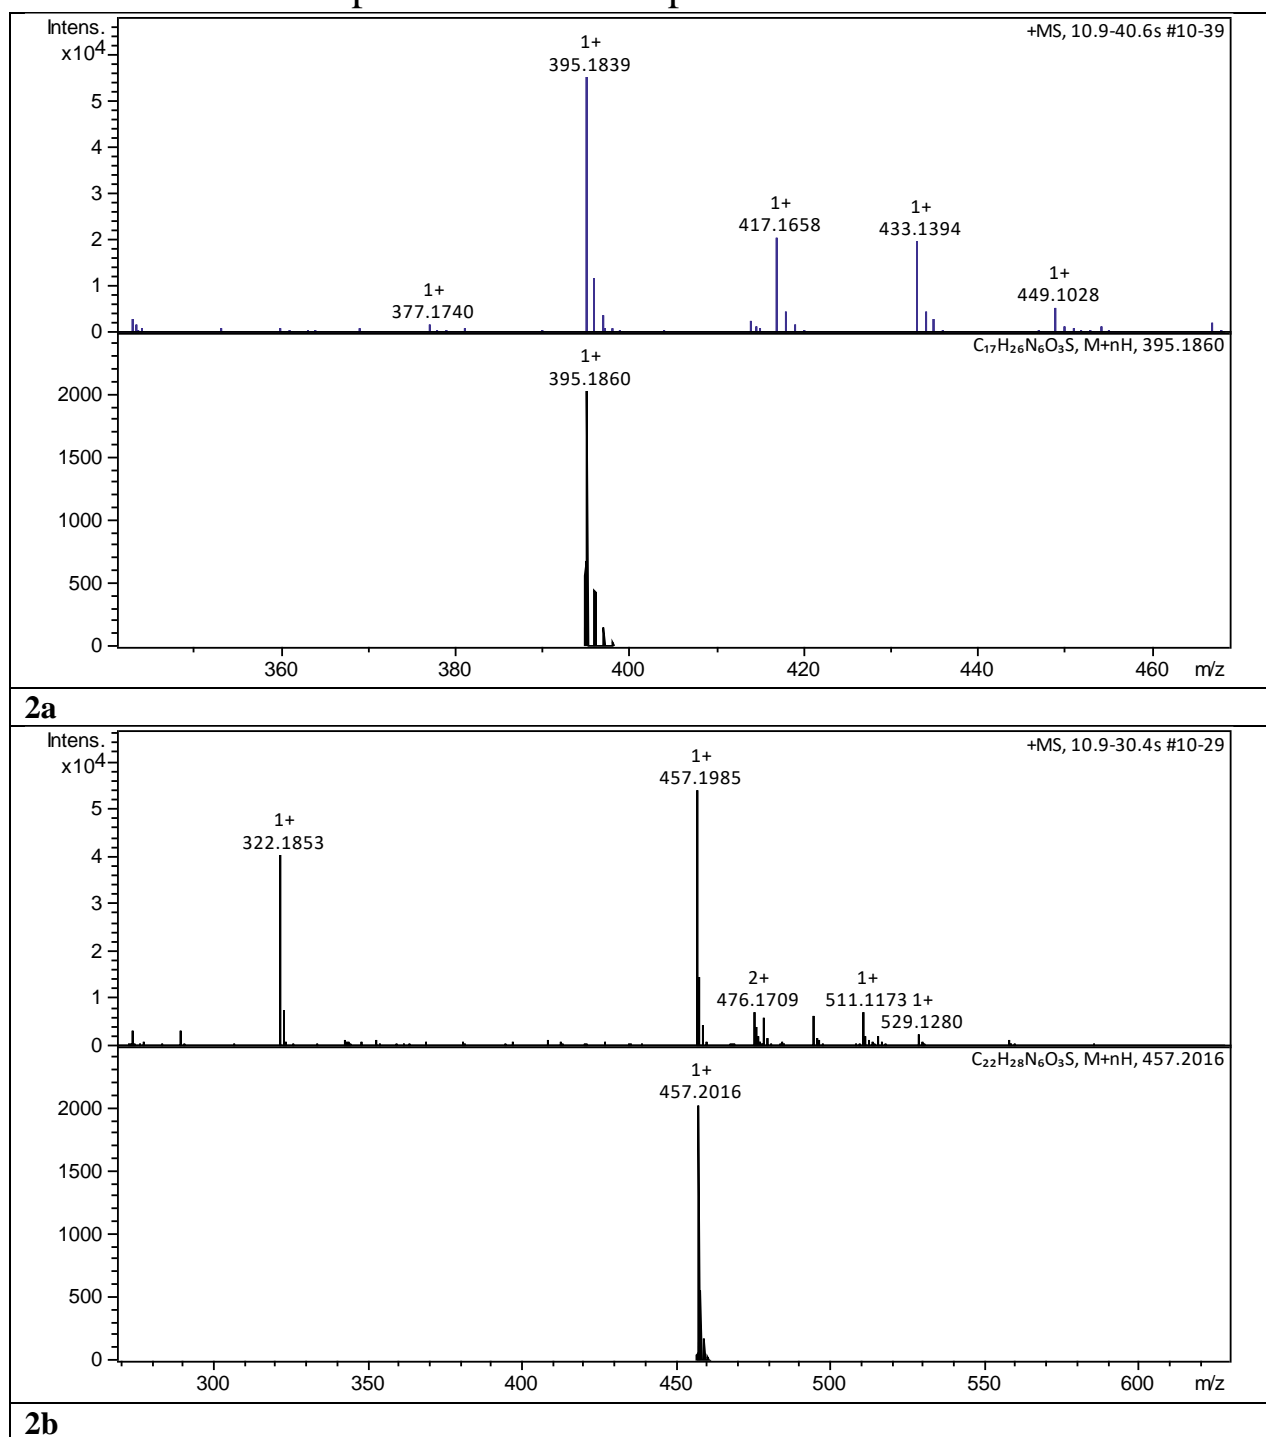

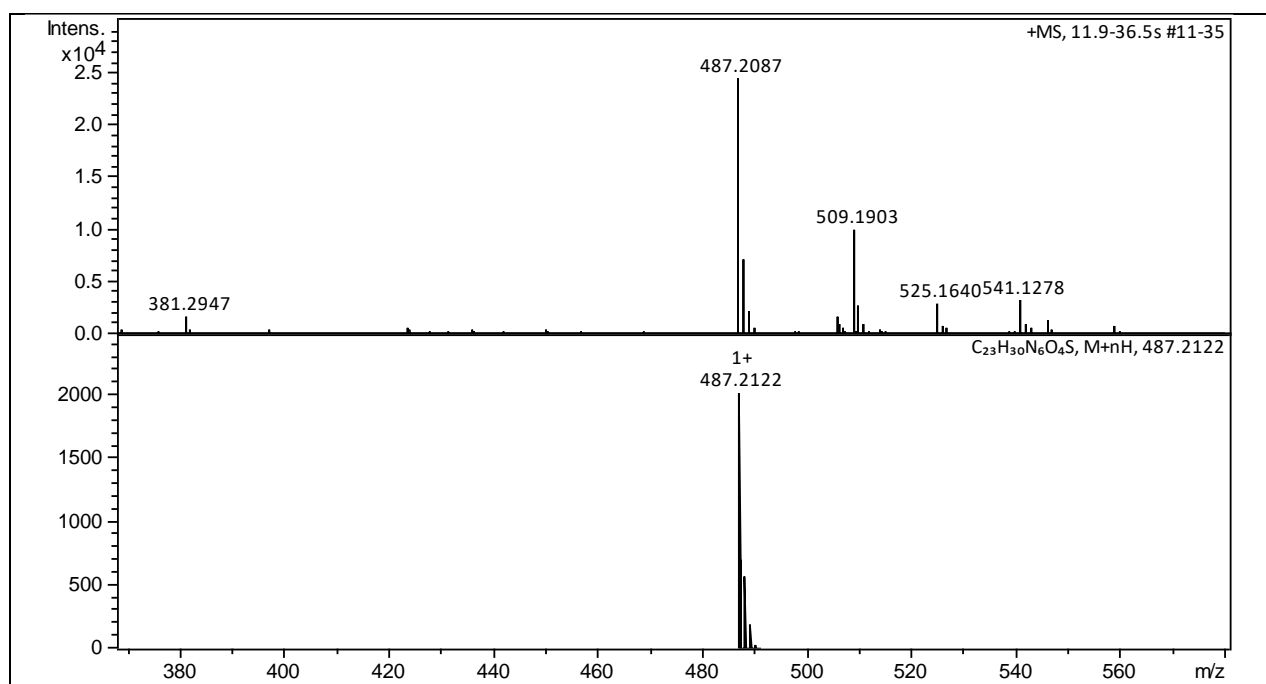

**2c**

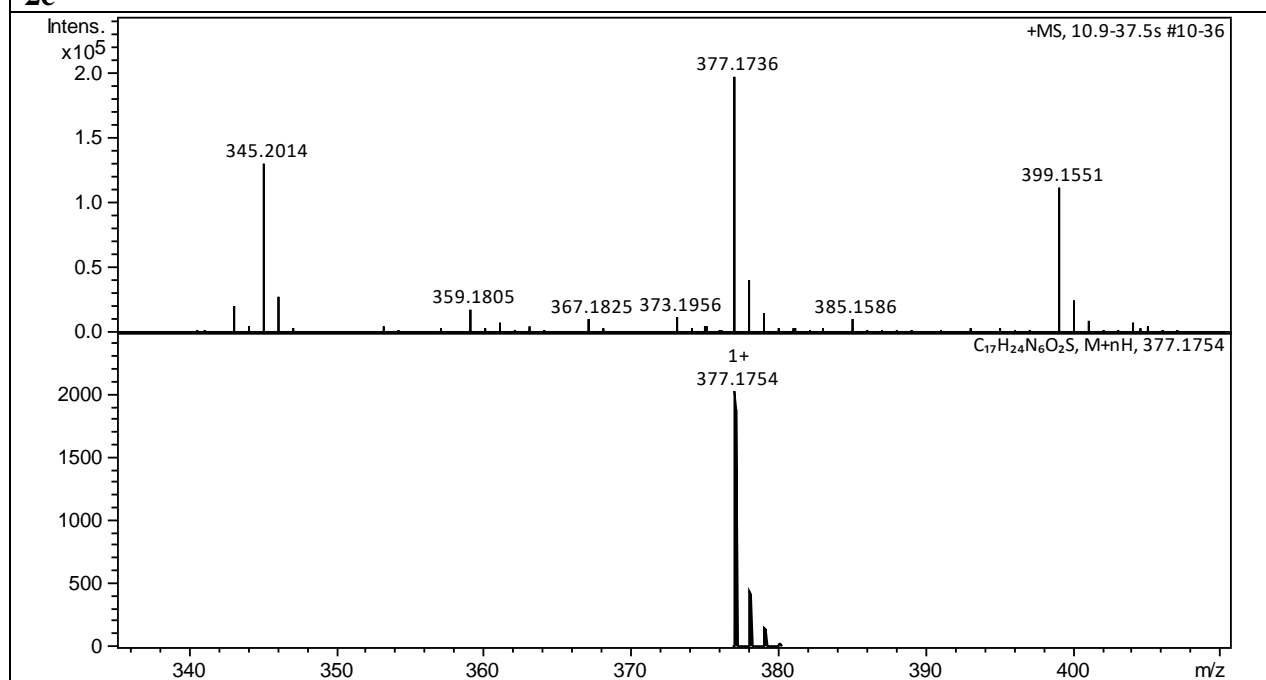

**3a**

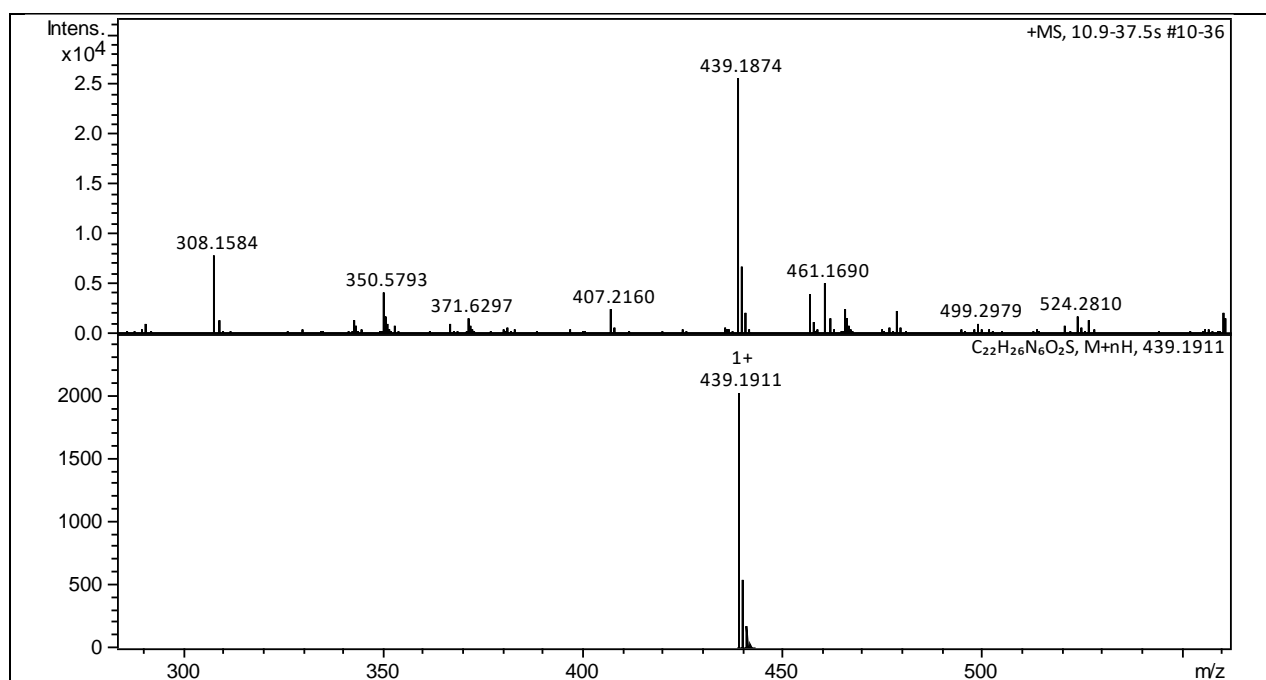

**3b**

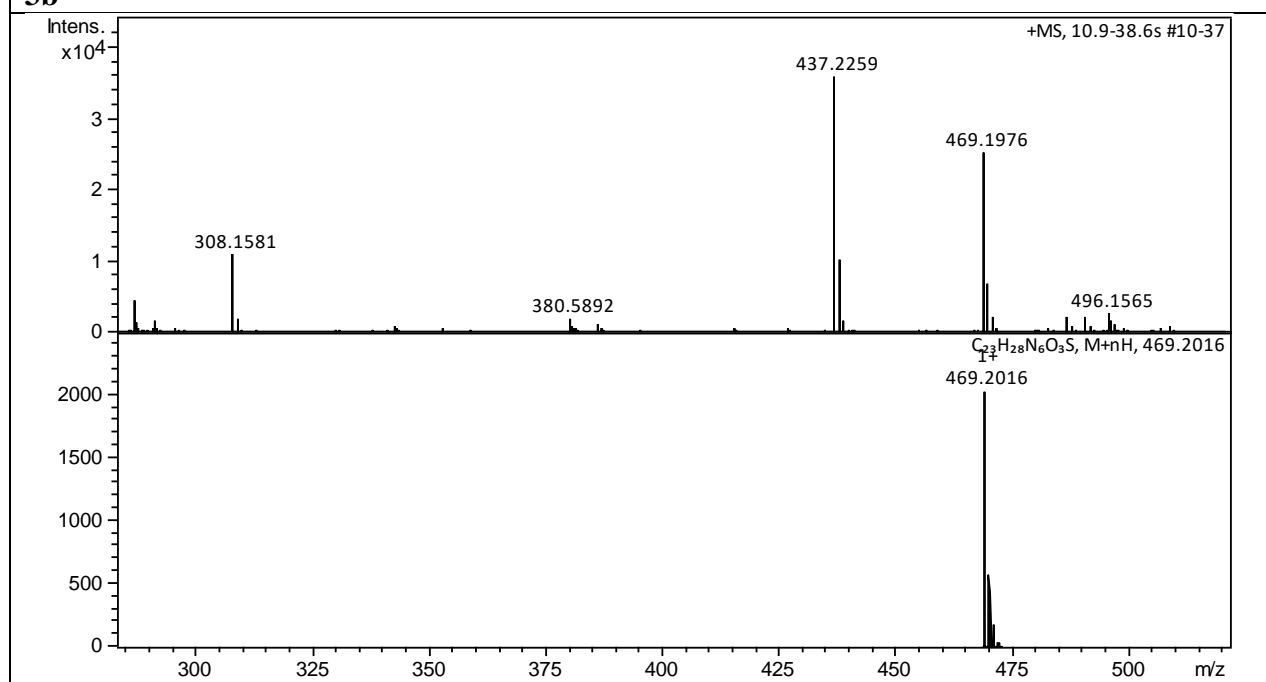

**3c**

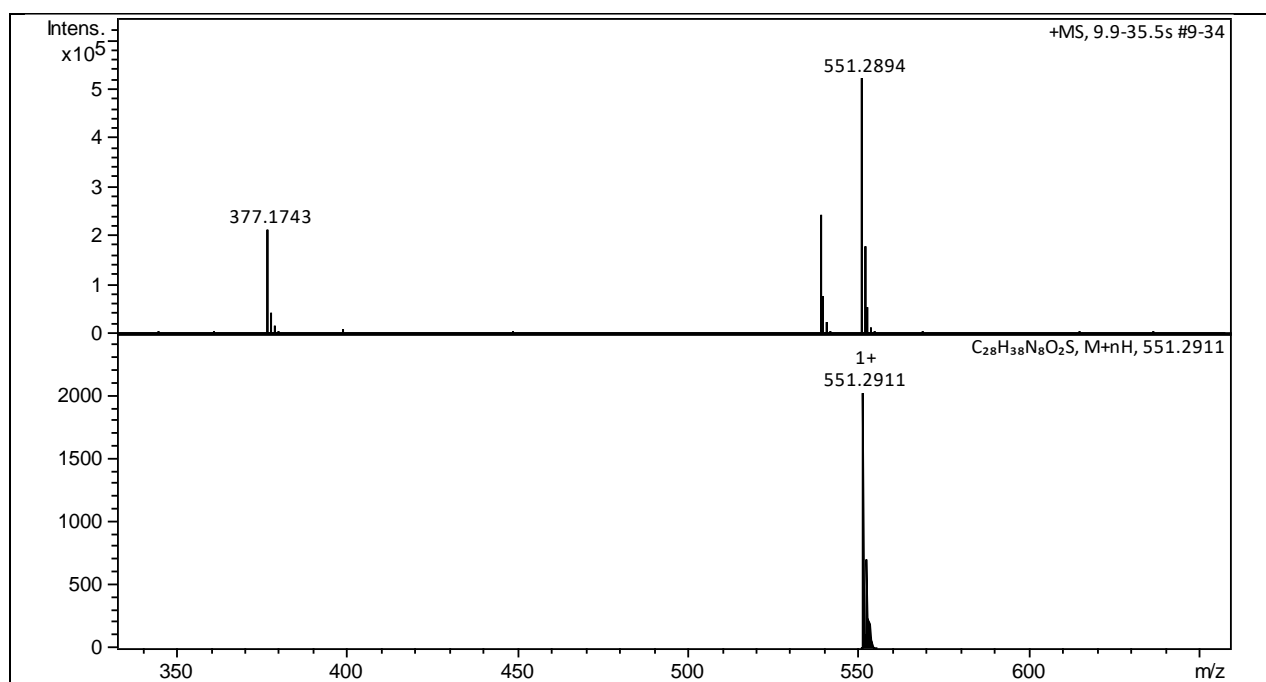

**4a**

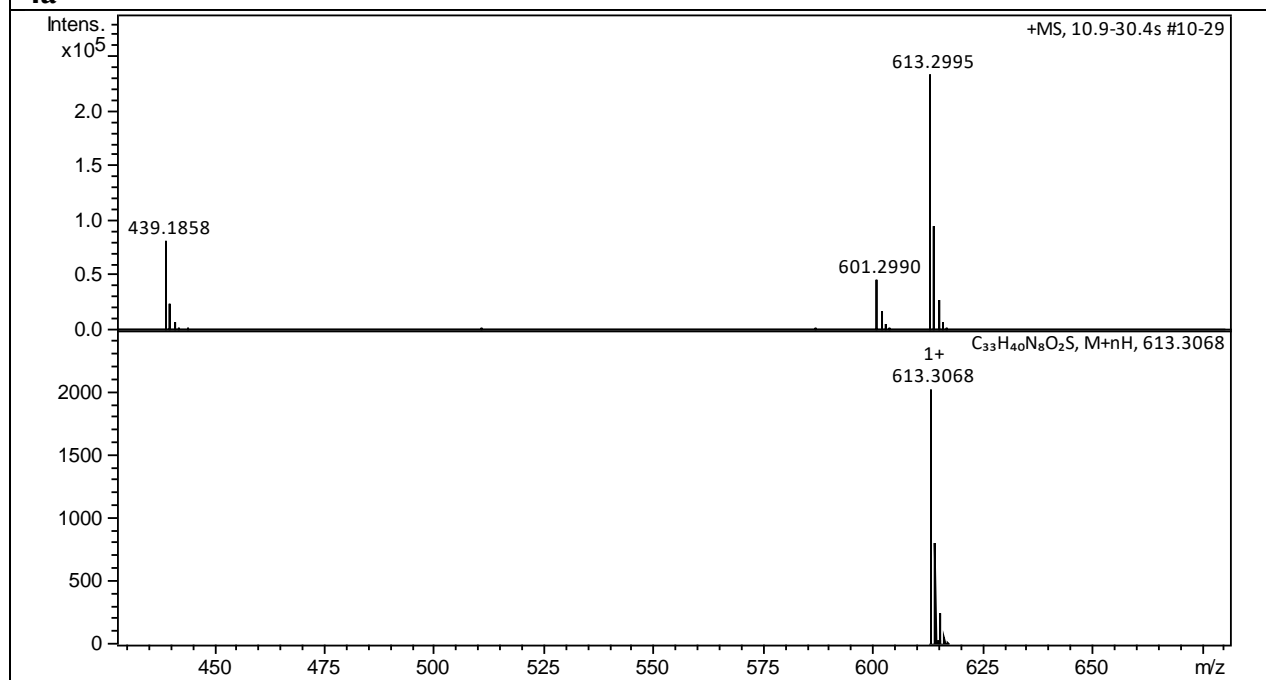

**4b**

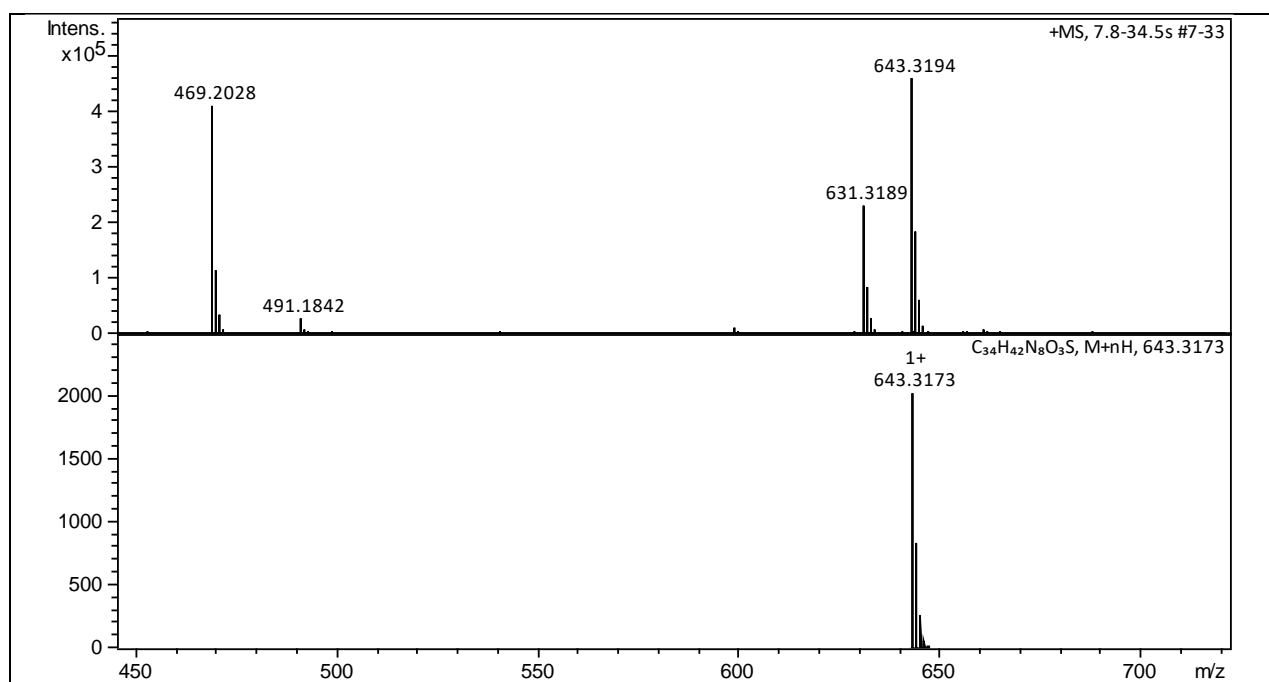

**4c**

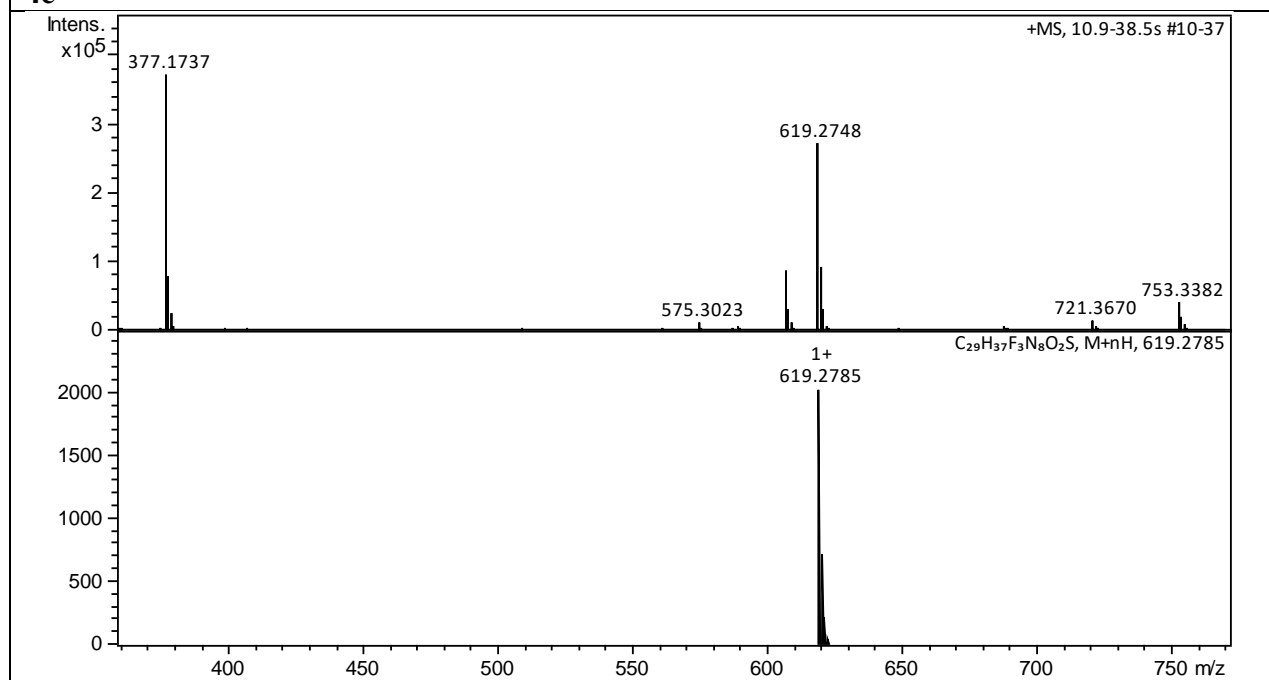

**5a**



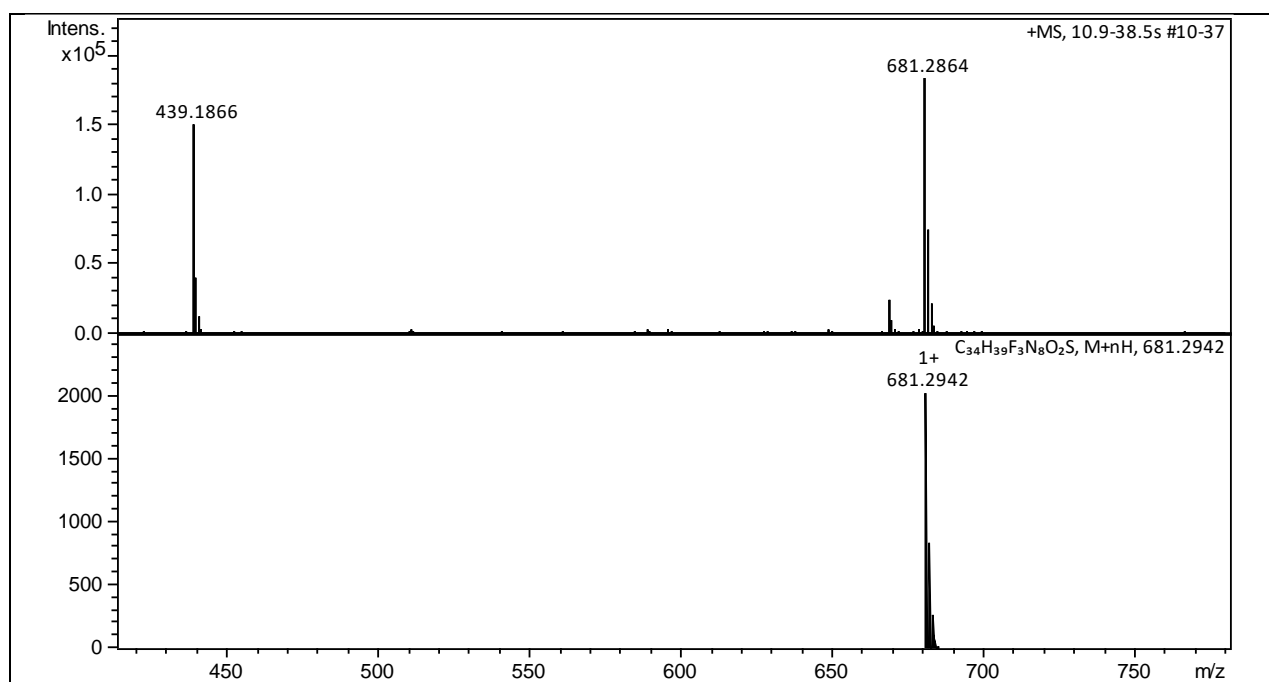

**5b**

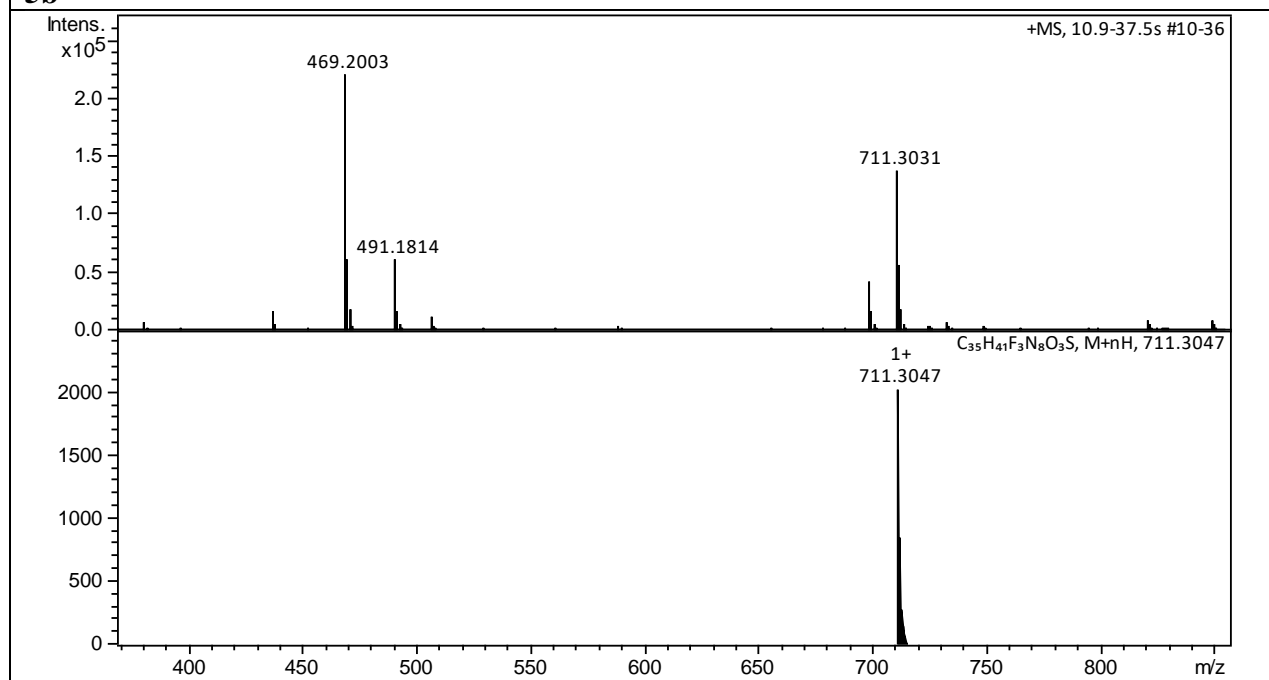

**5c**

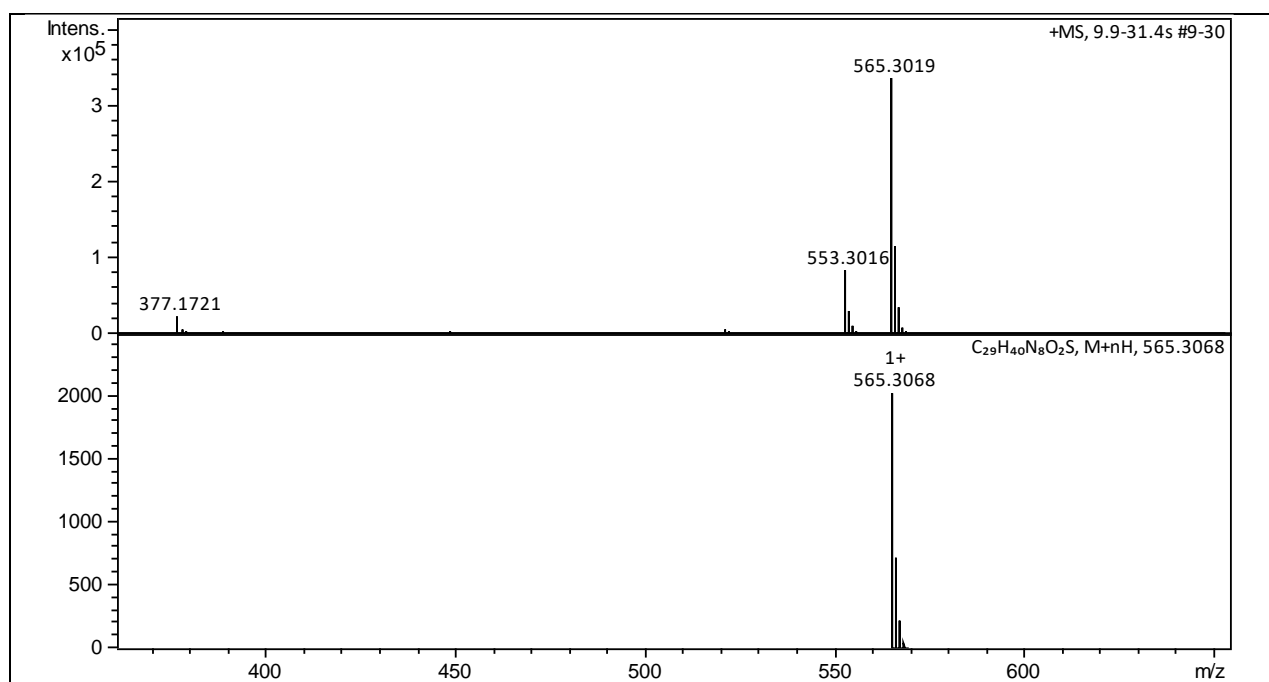

**6a**

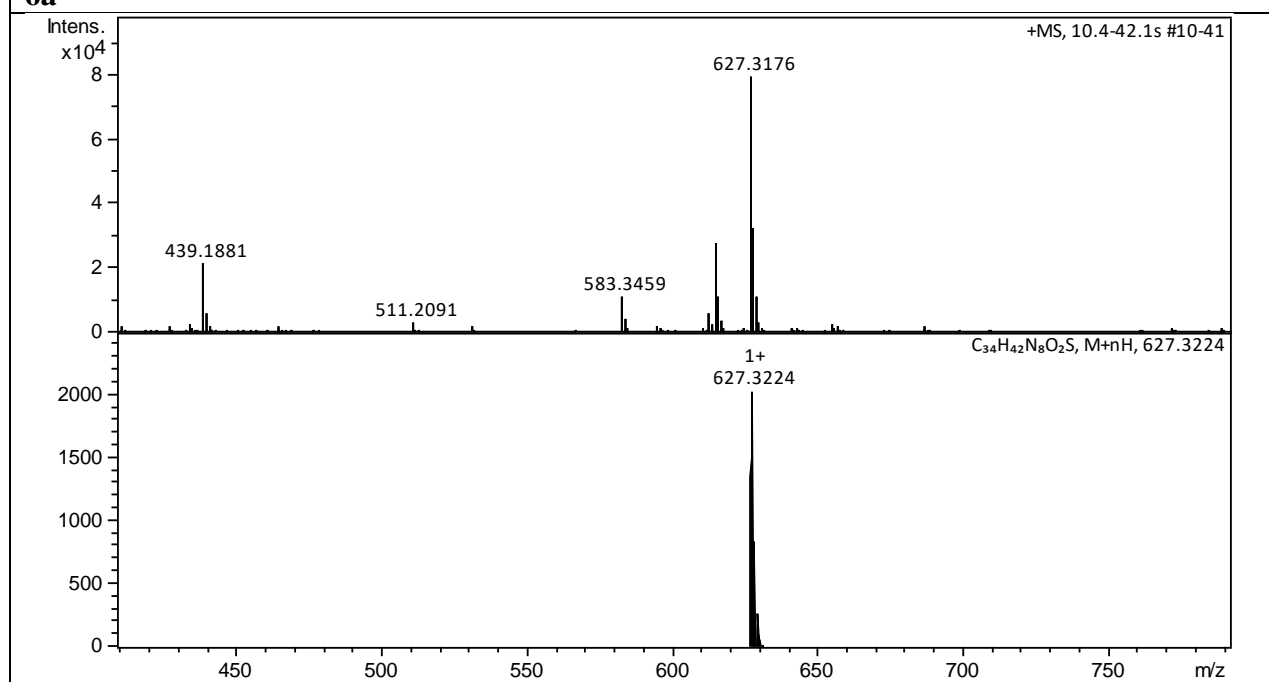

**6b**

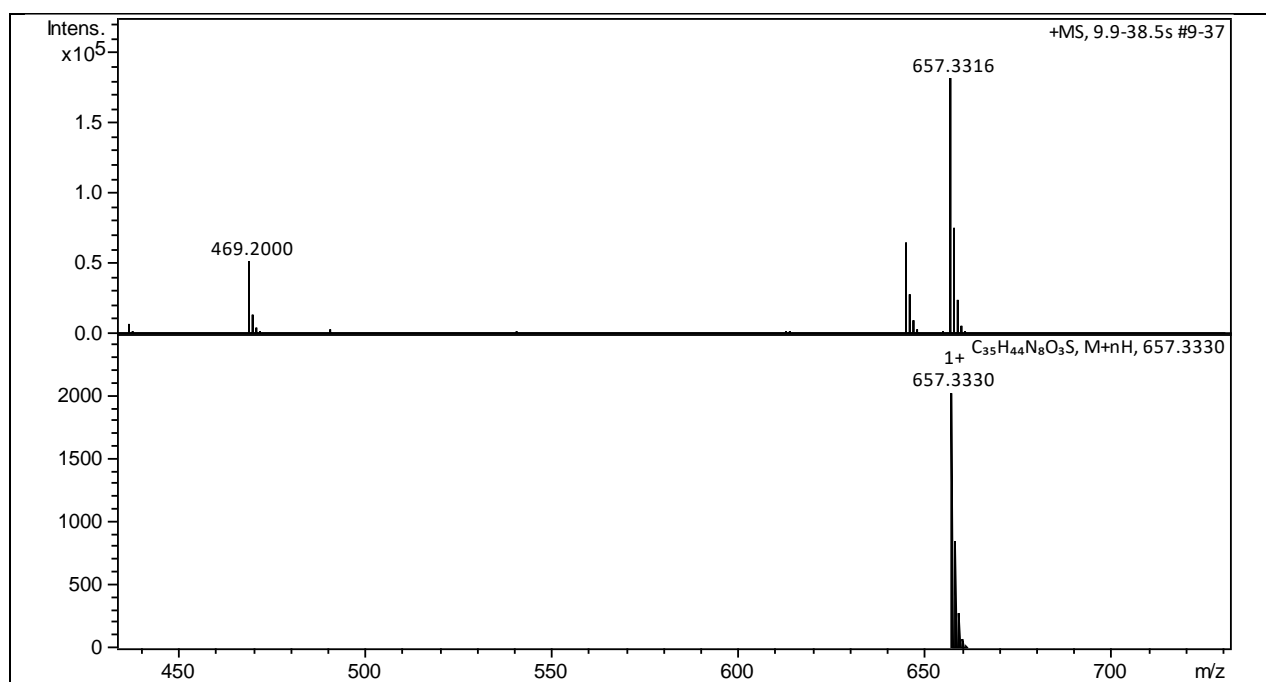

**6c**

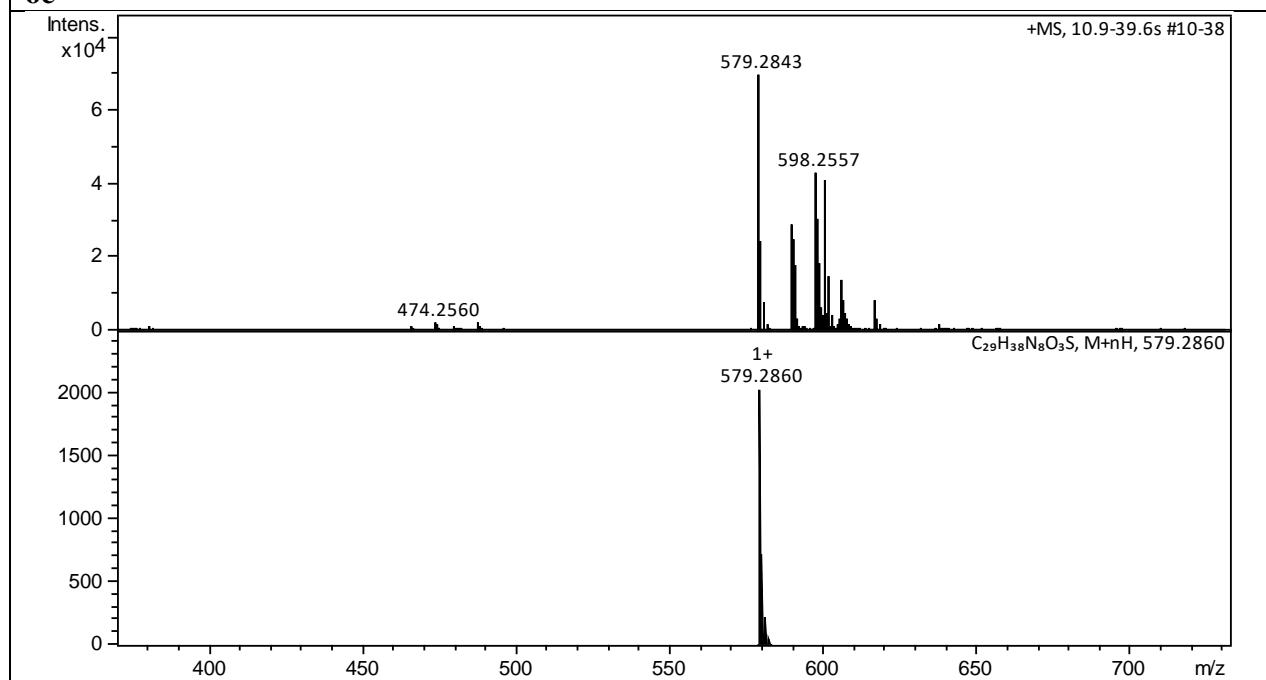

**7a**

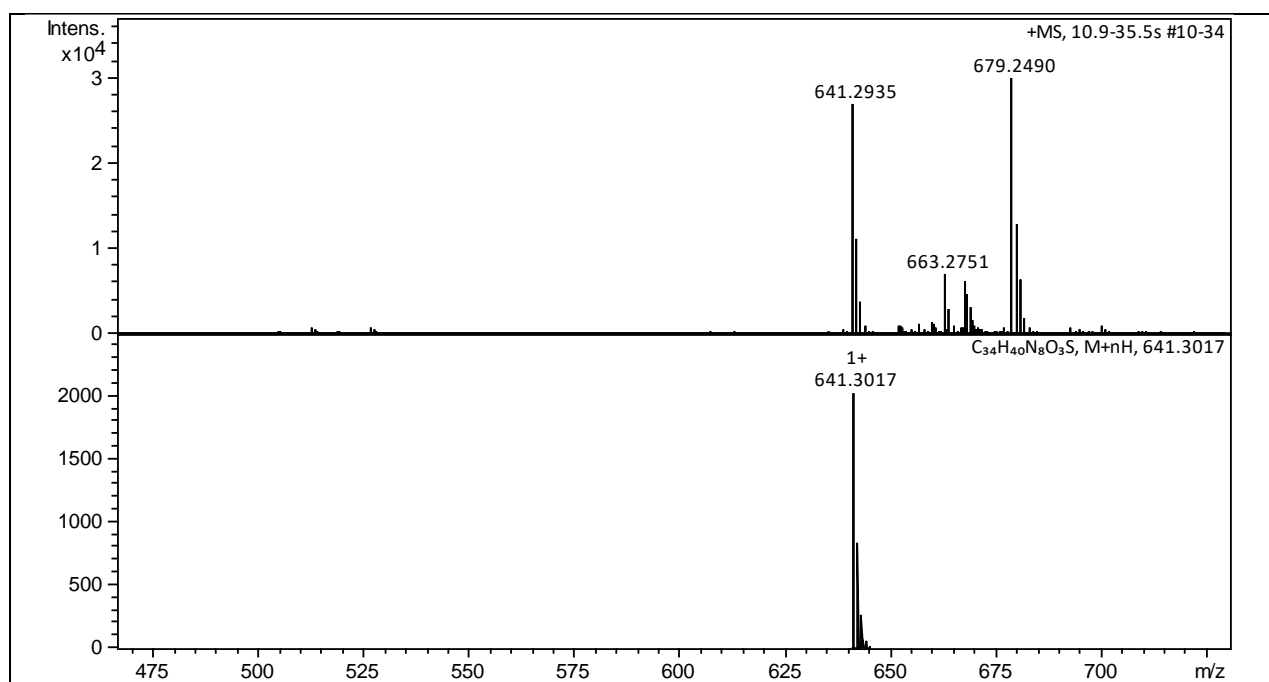

**7b**

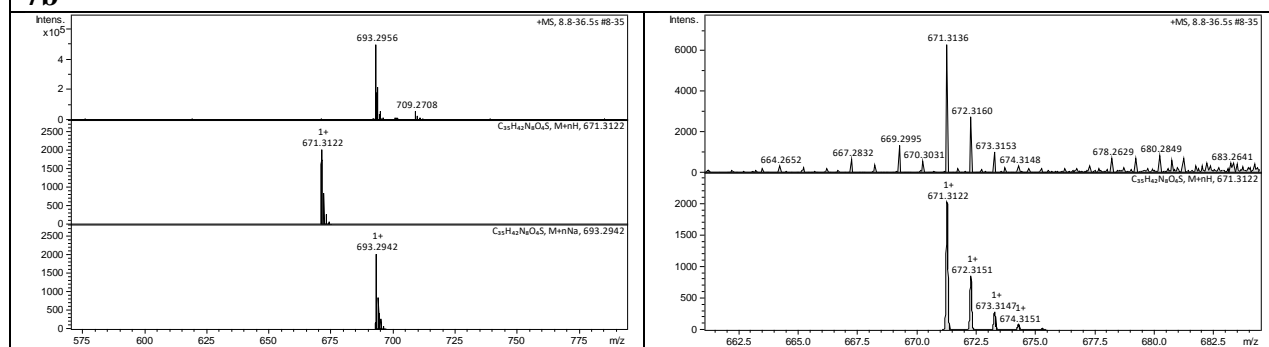

**7c**

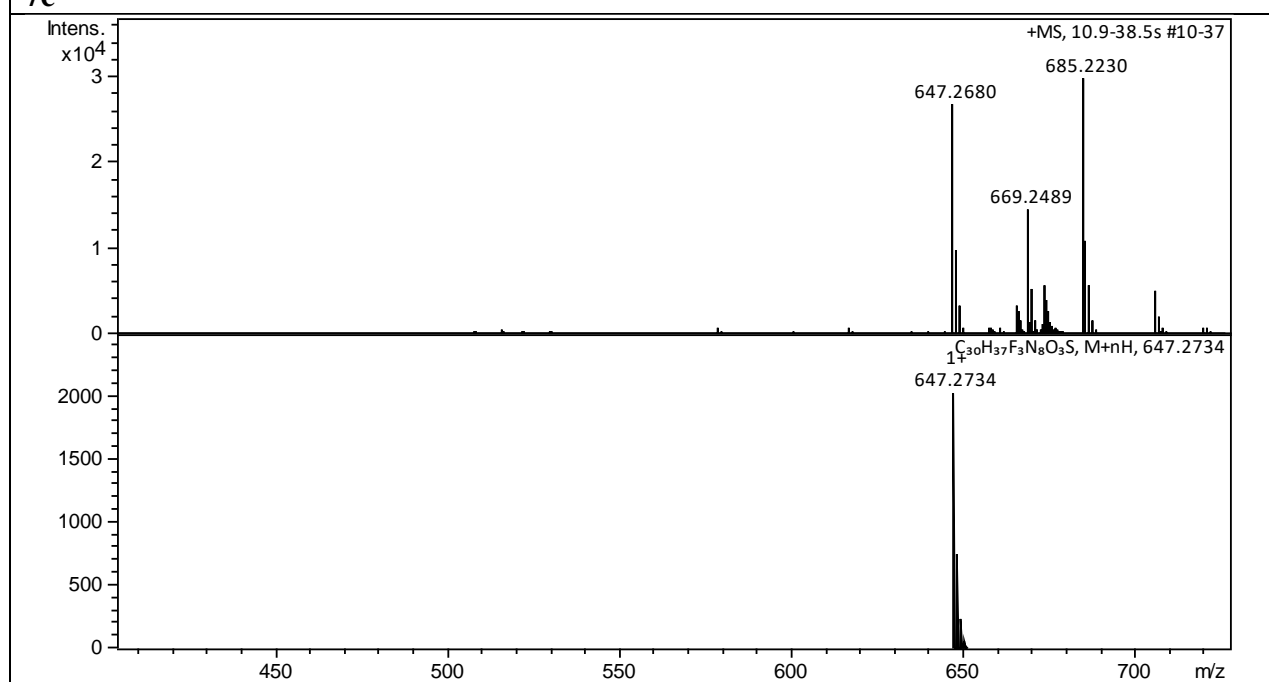

**8a**

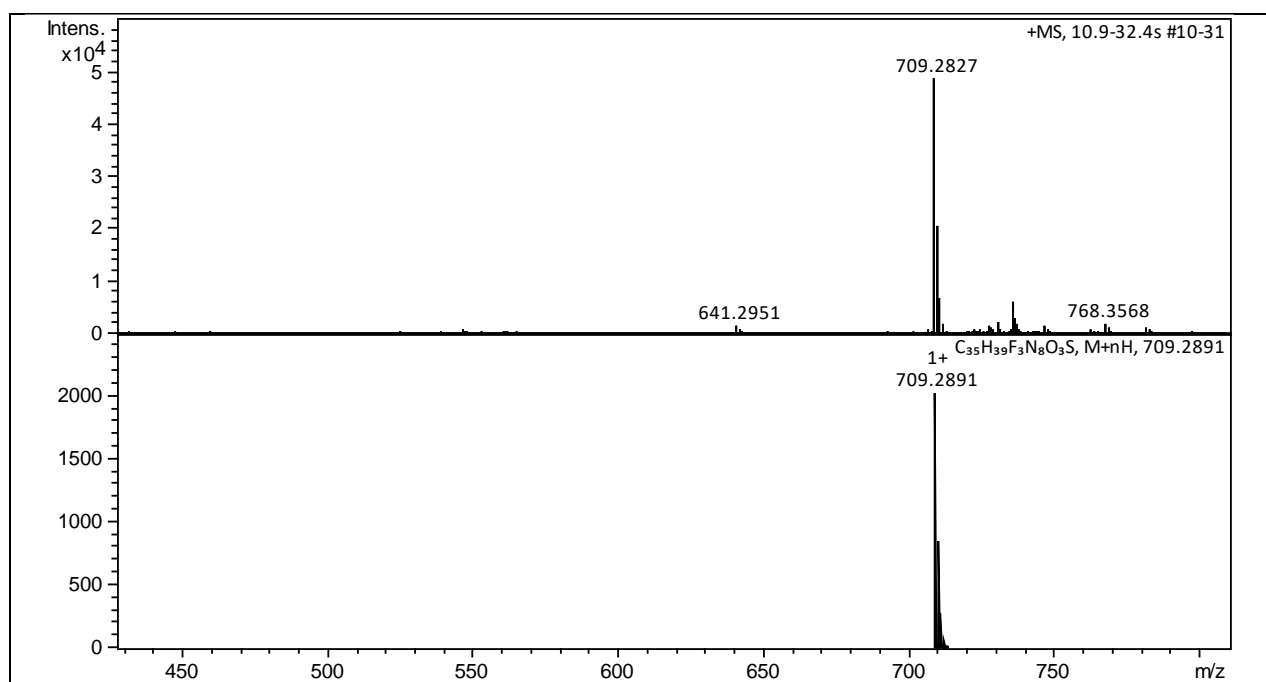

**8b**

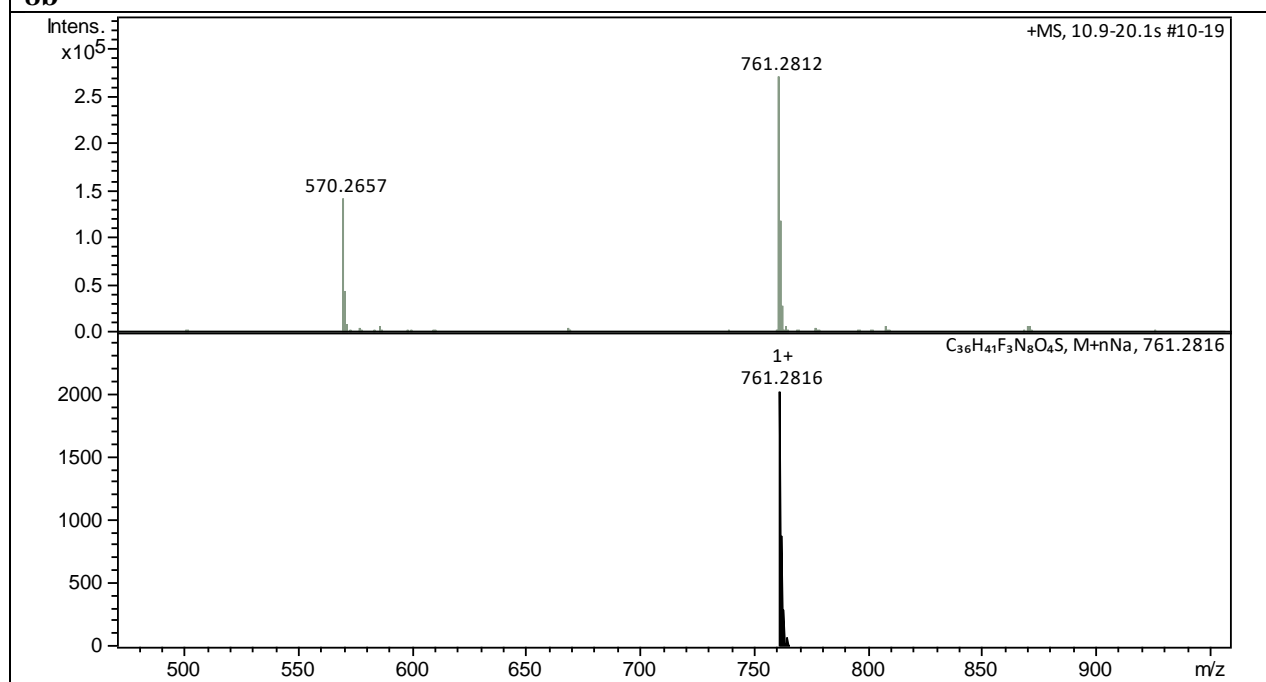

**8c**

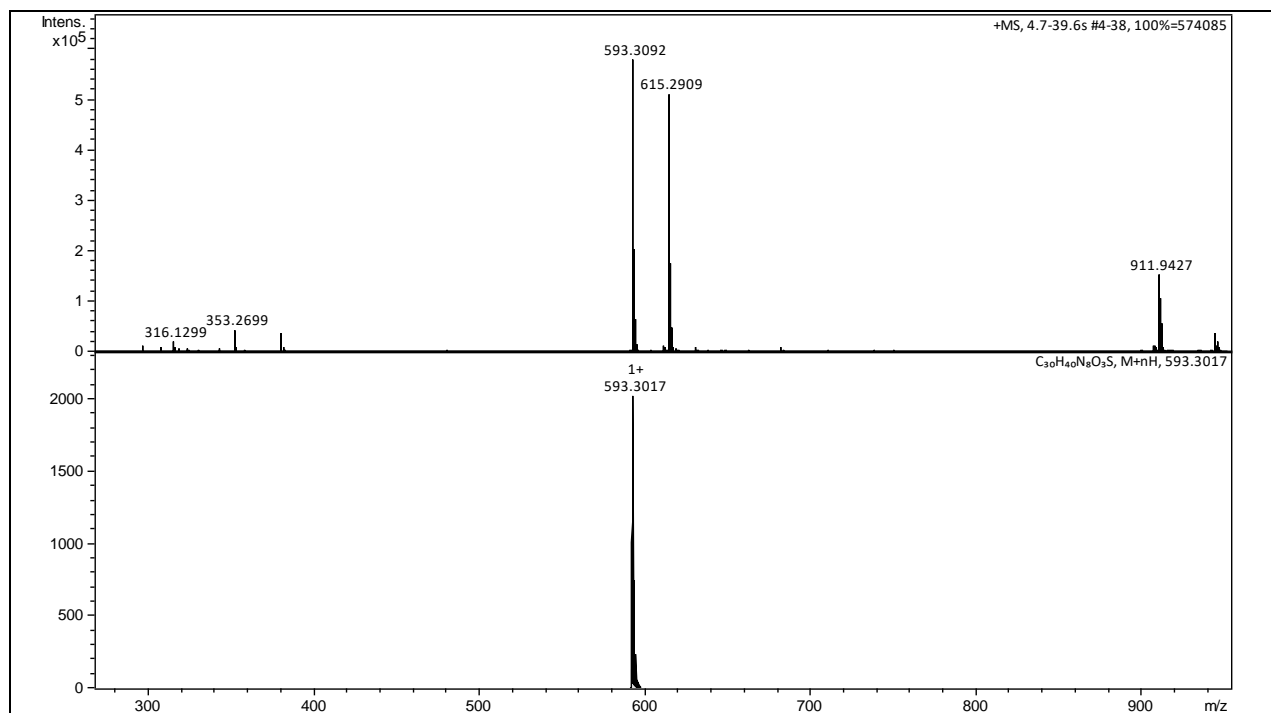

9a

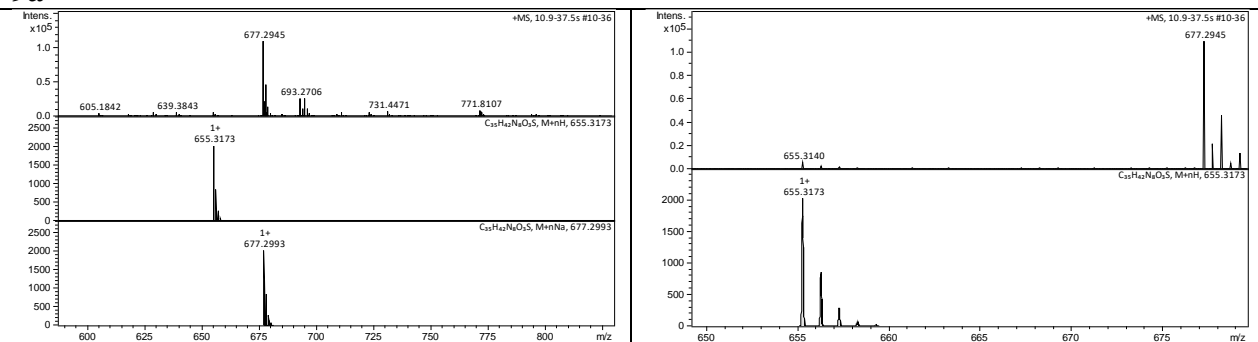

9b

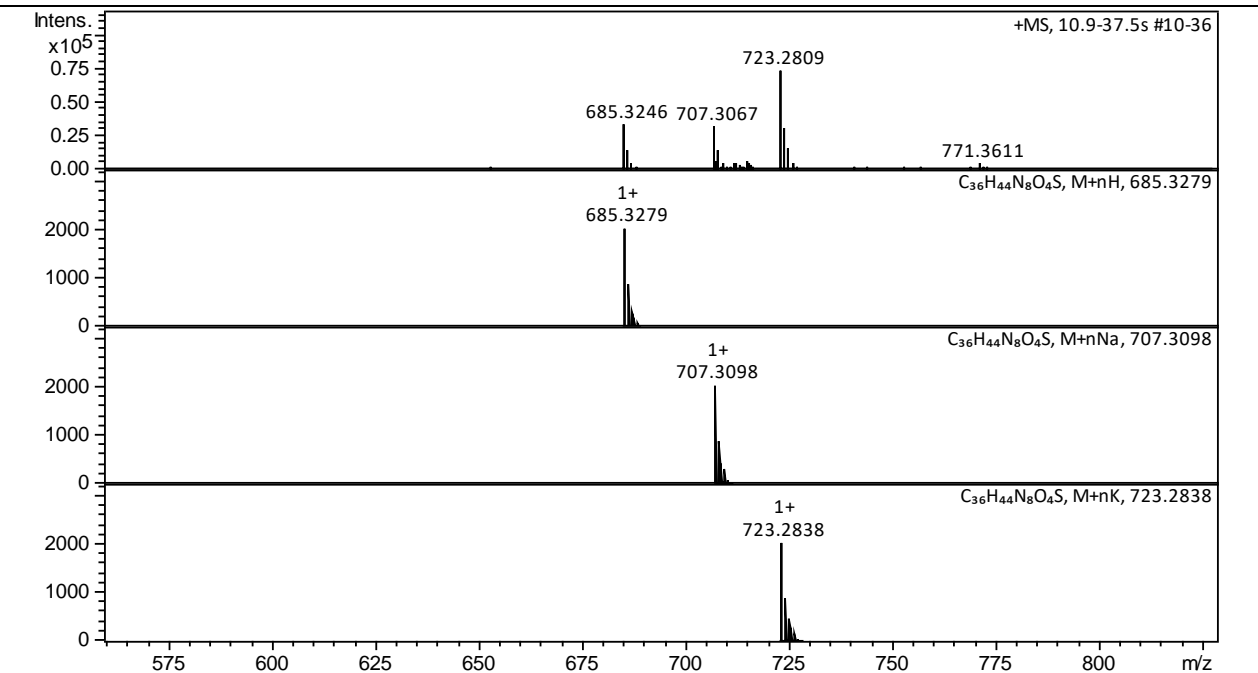

9c

**Table S4 – FT-IR spectra of new compounds**

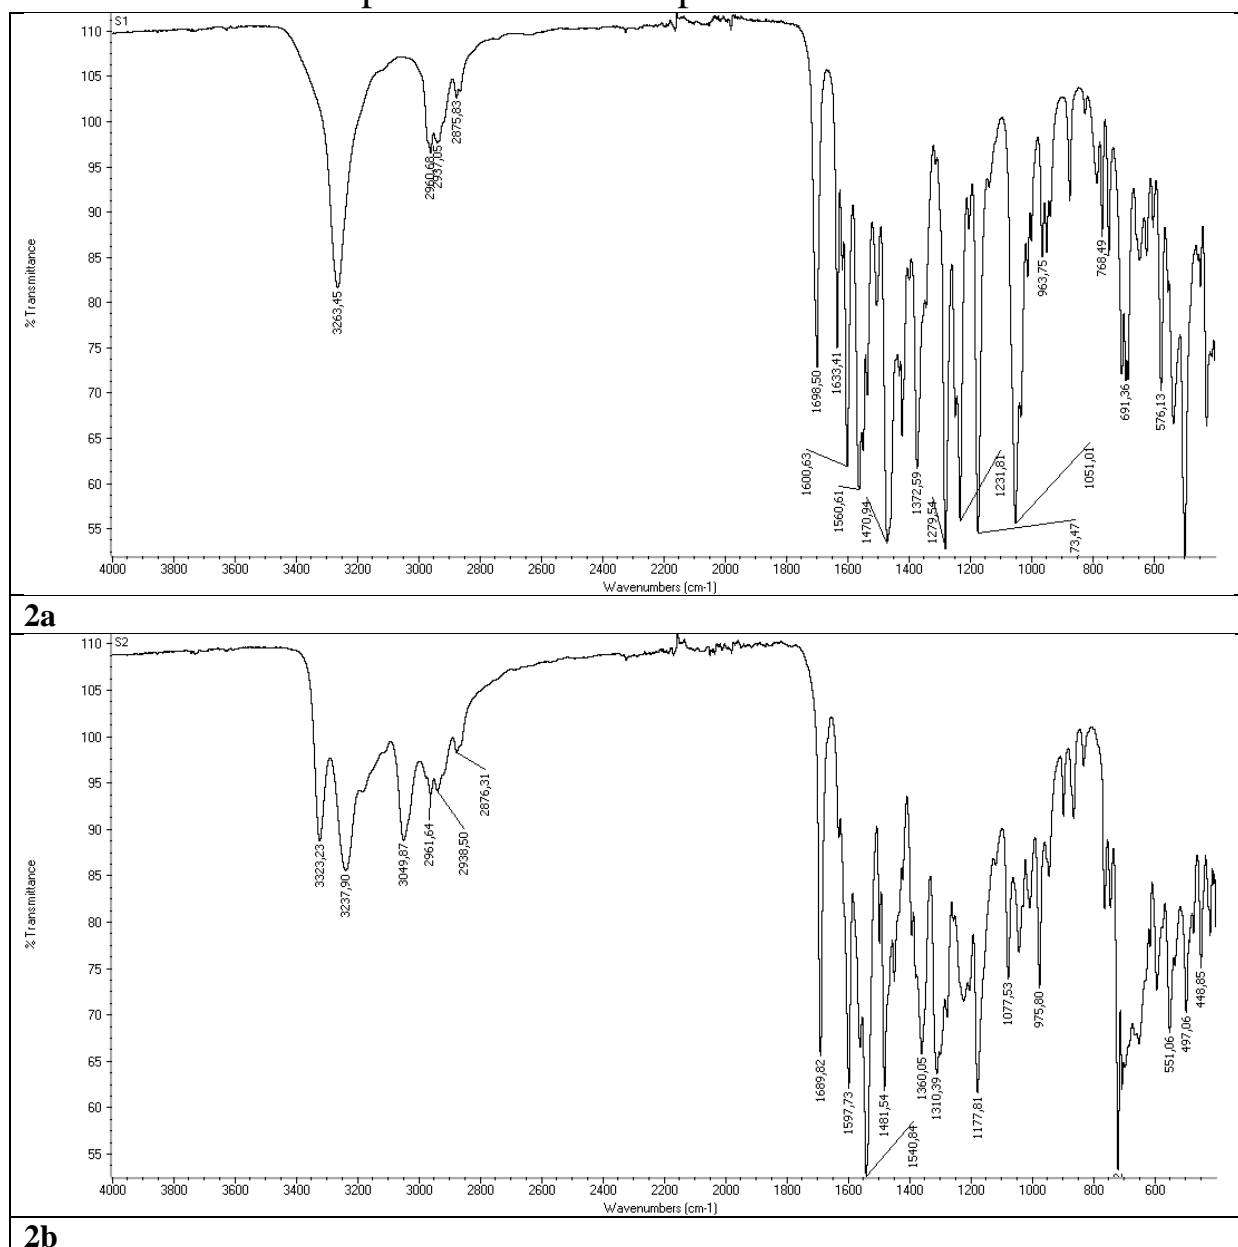

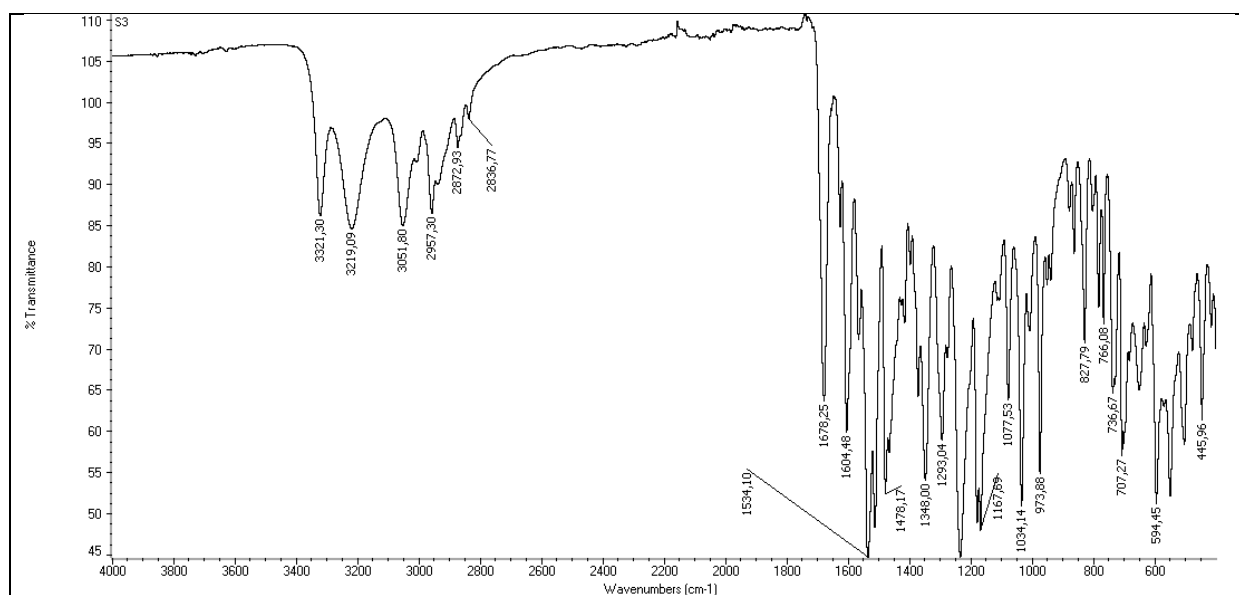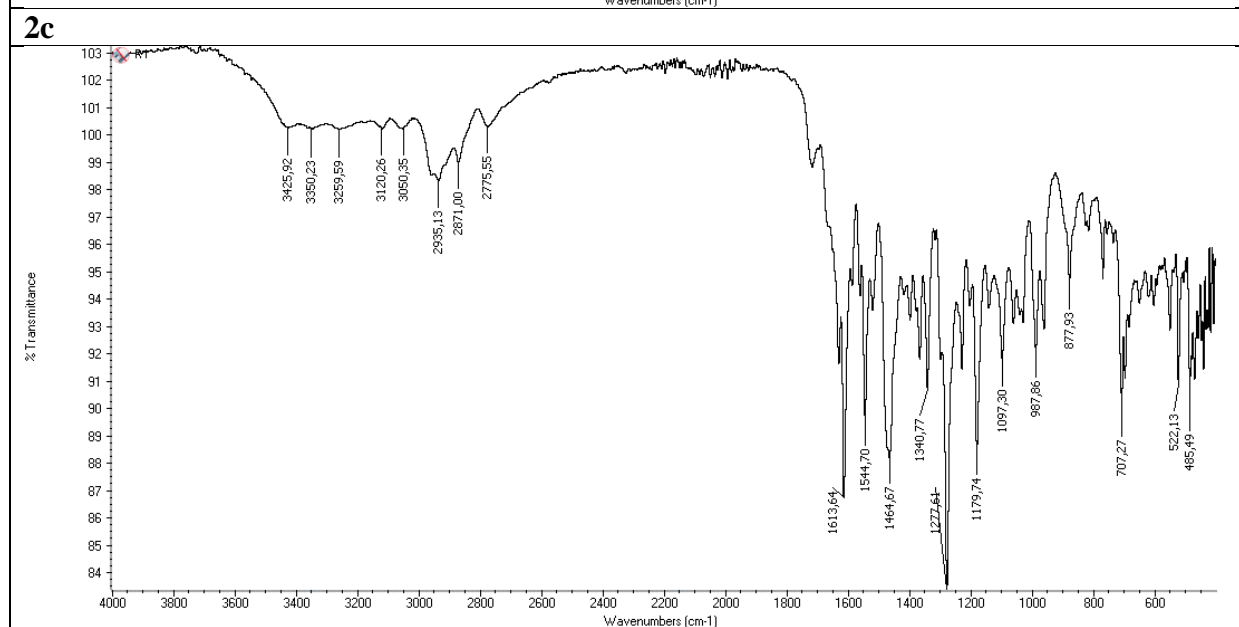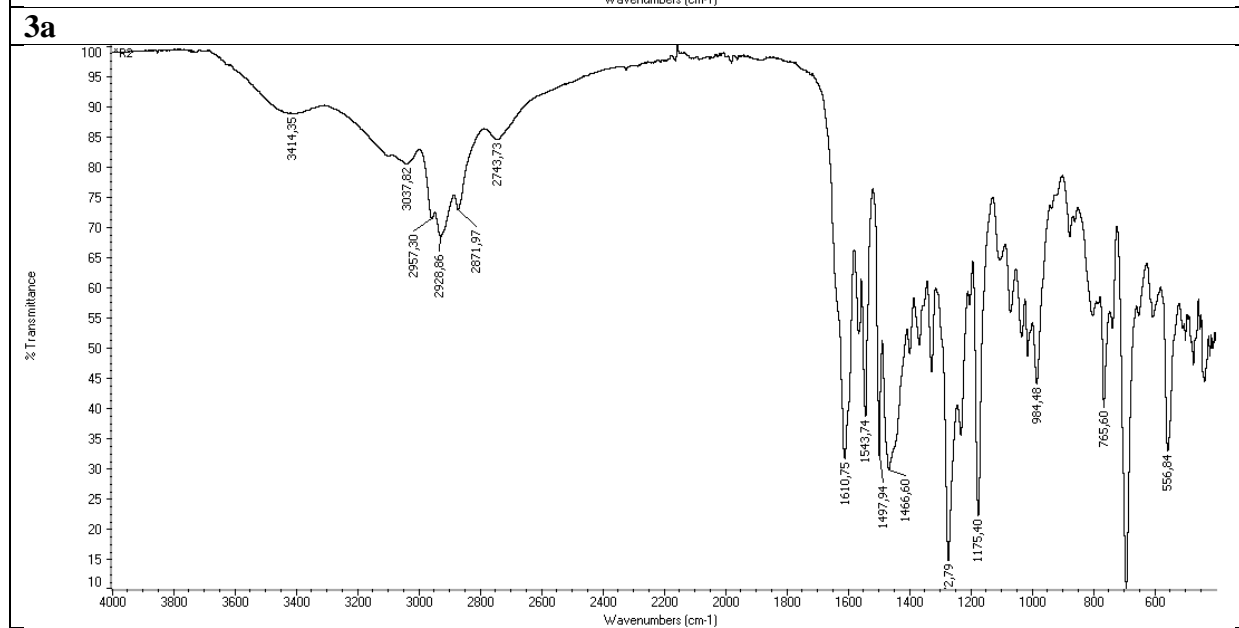

**3b**



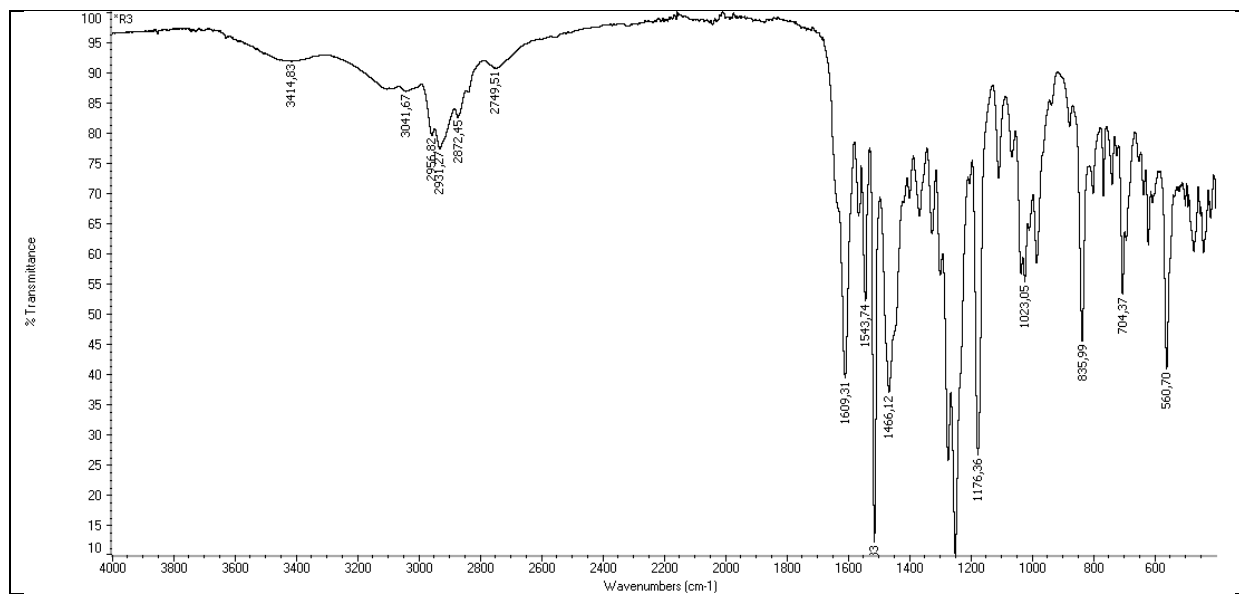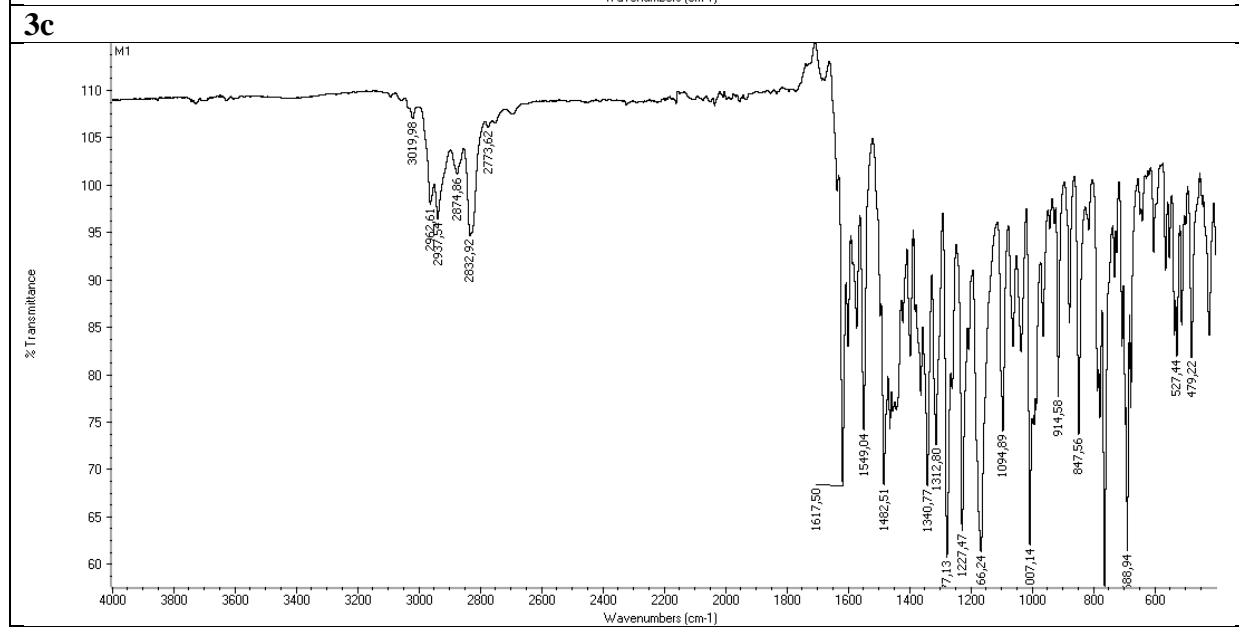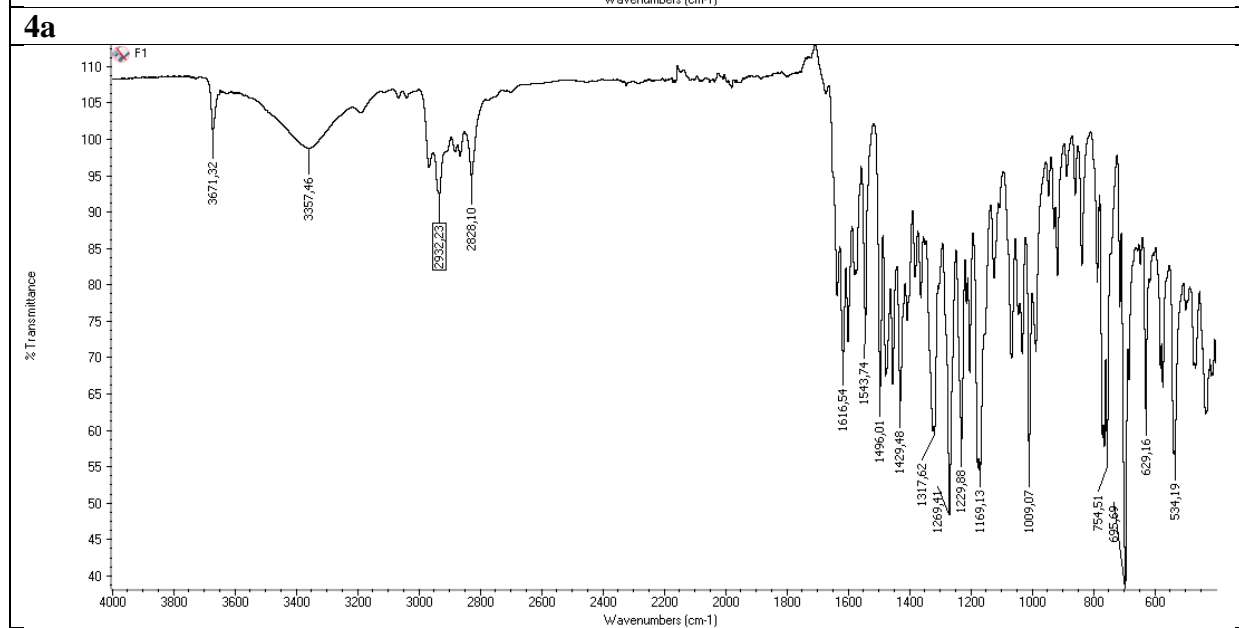

**4b**

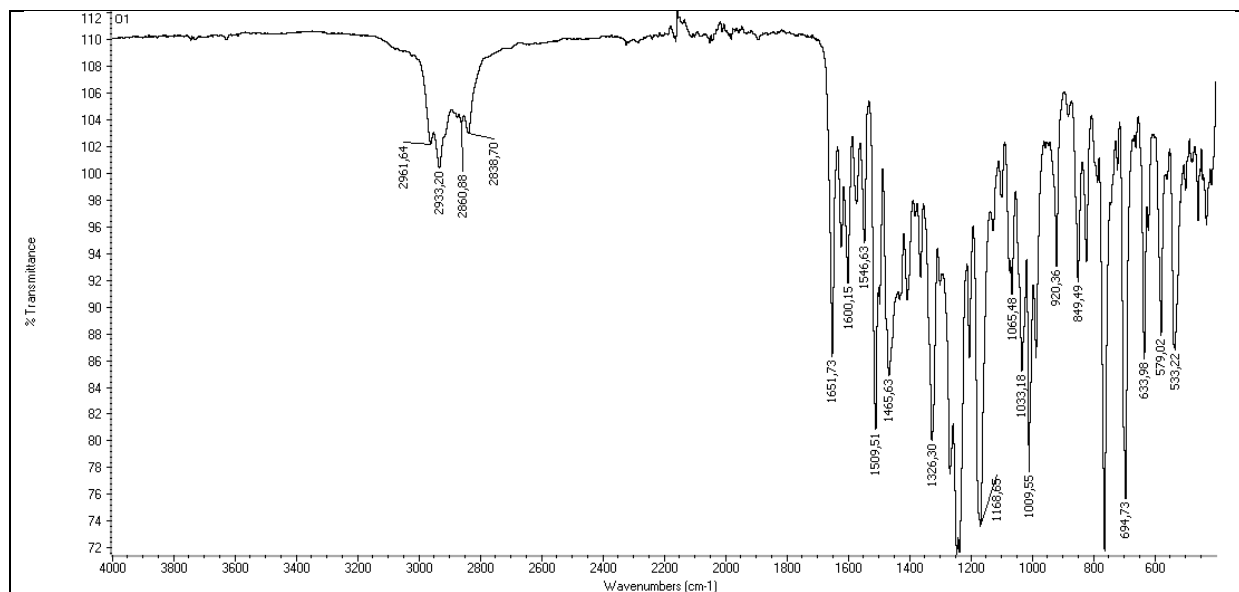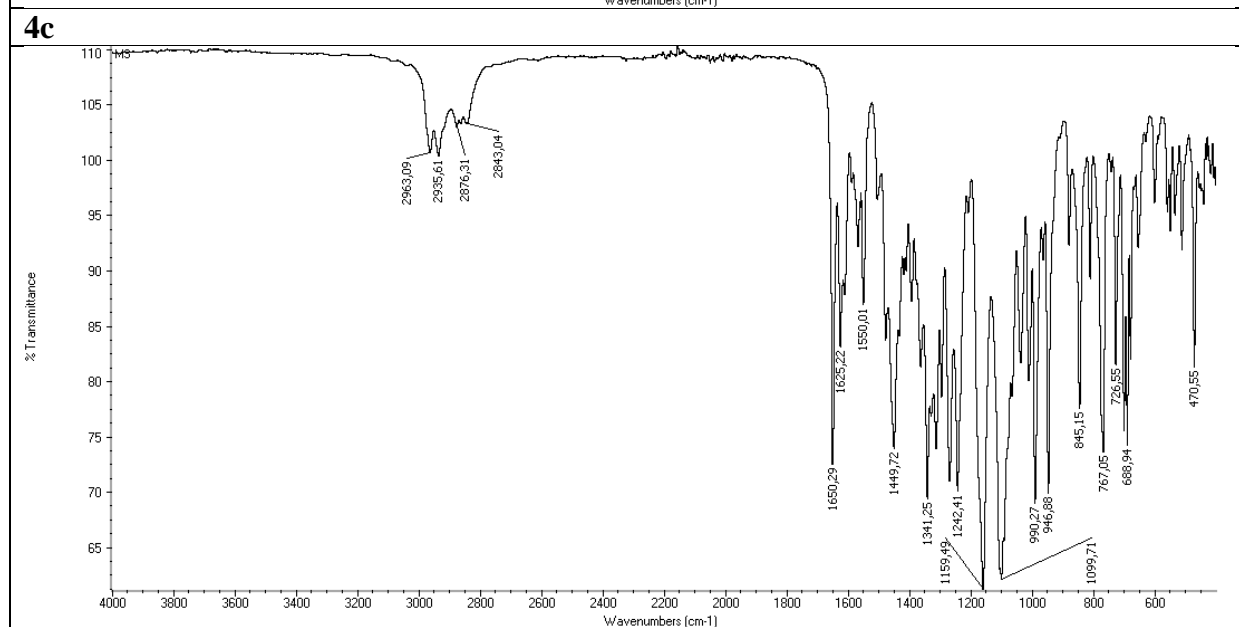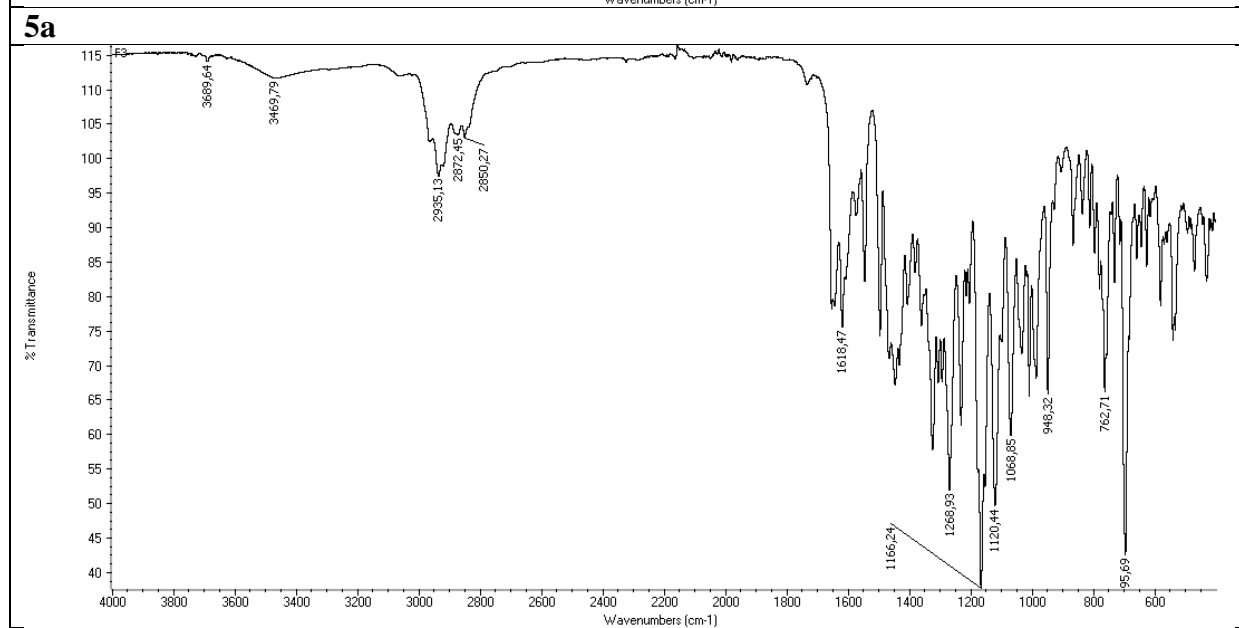

**5b**

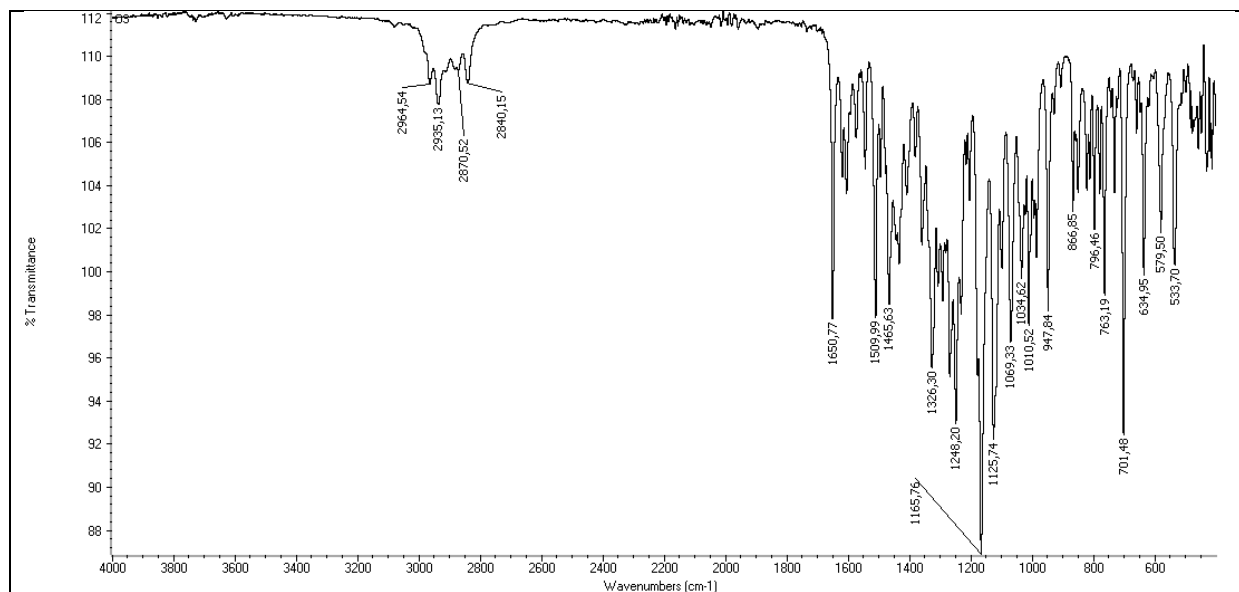

5c

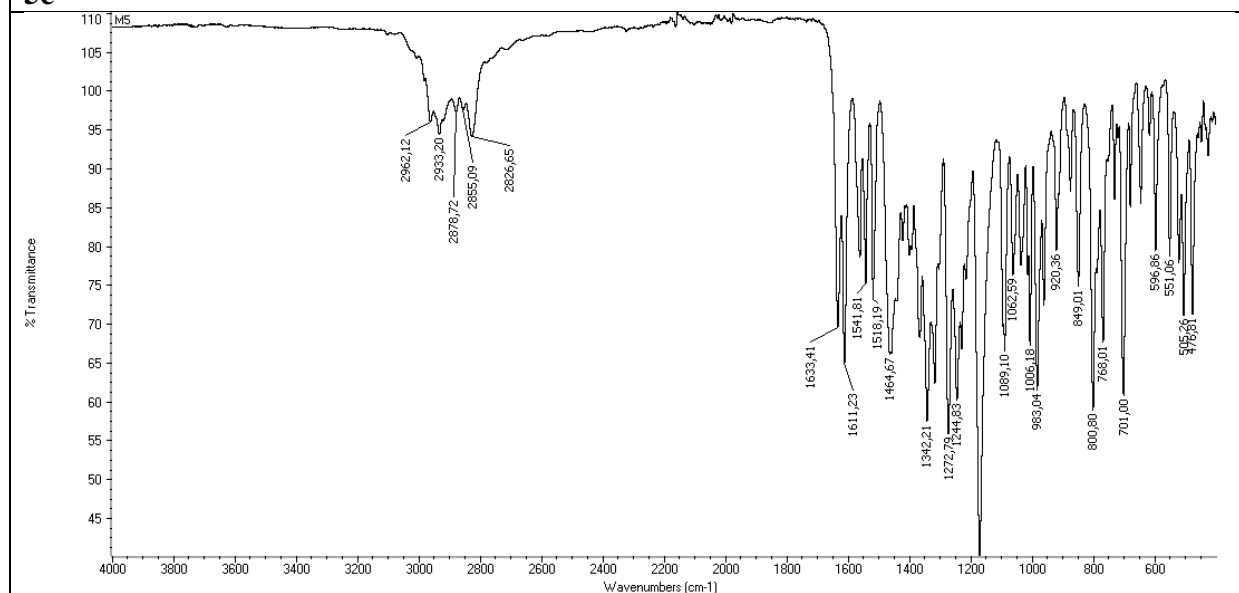

6a

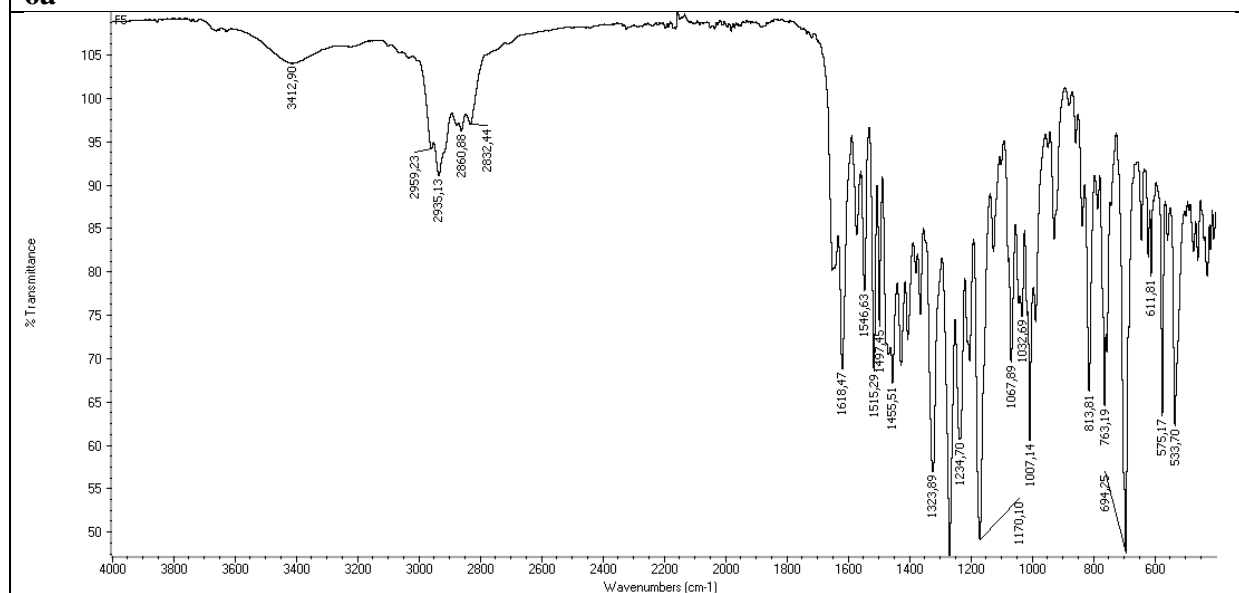

6b

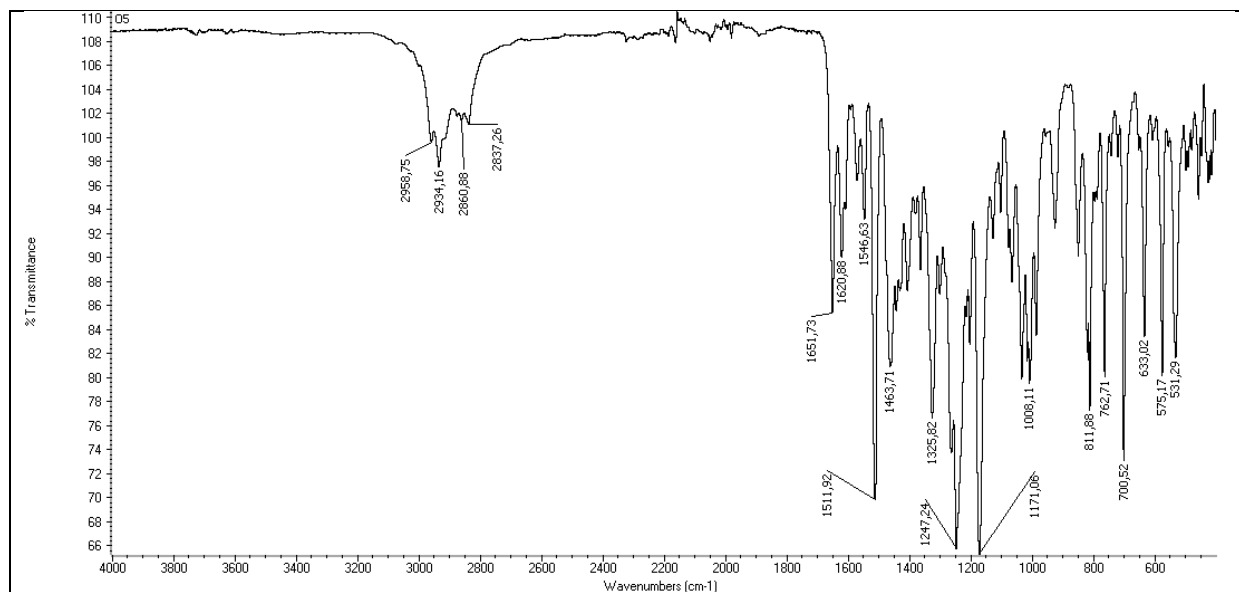

6c

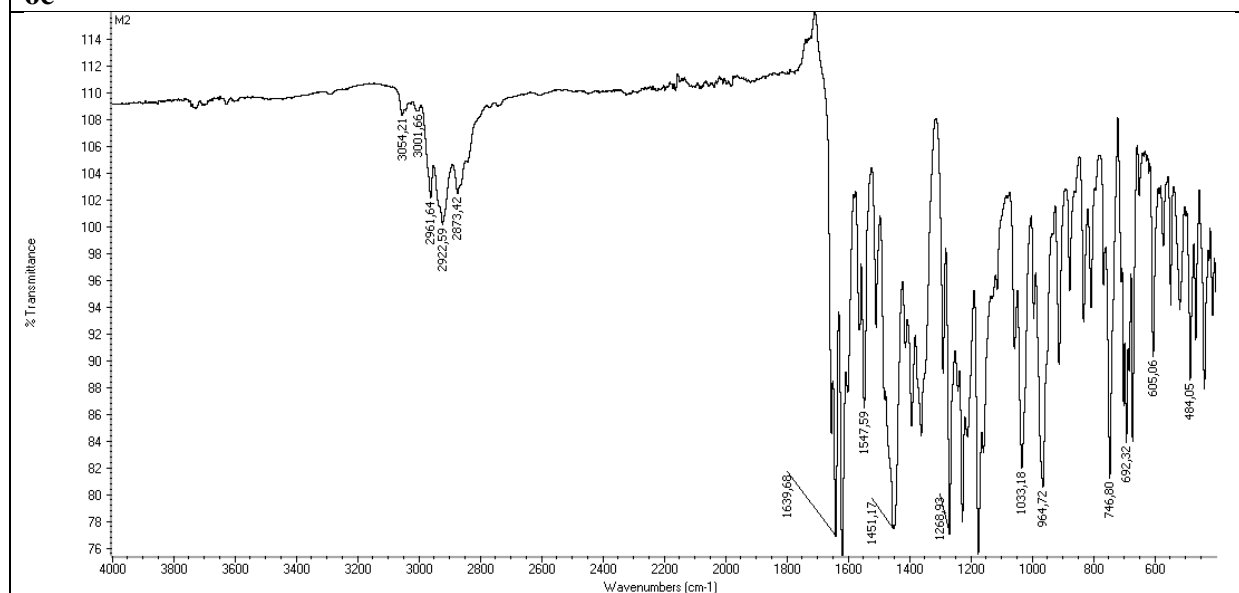

7a

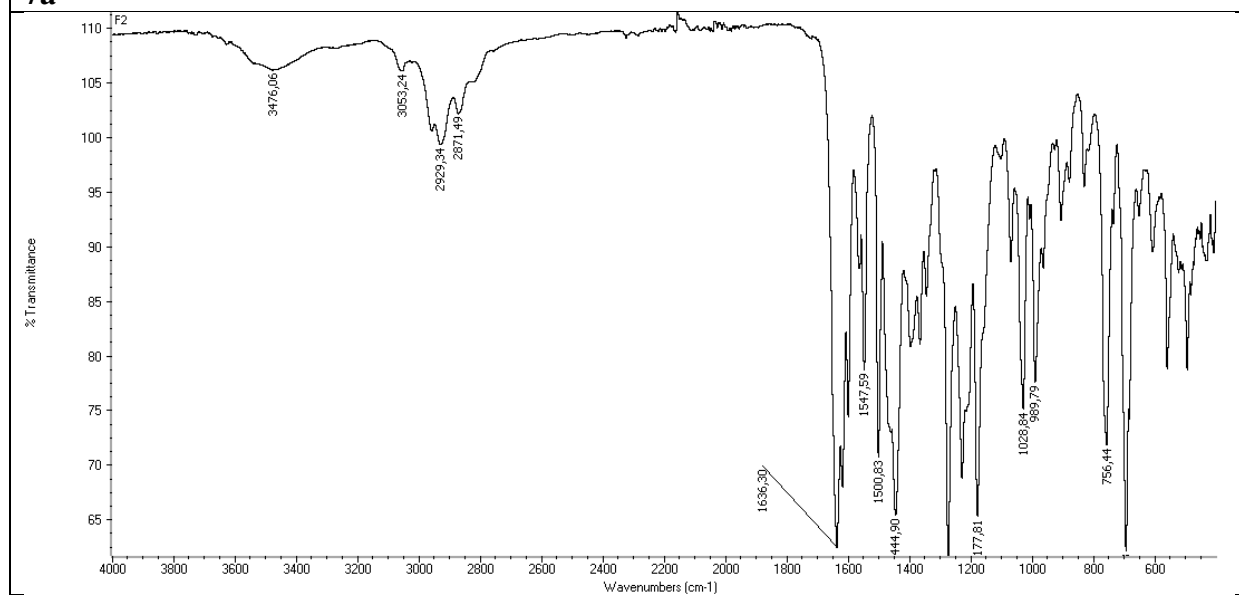

7b

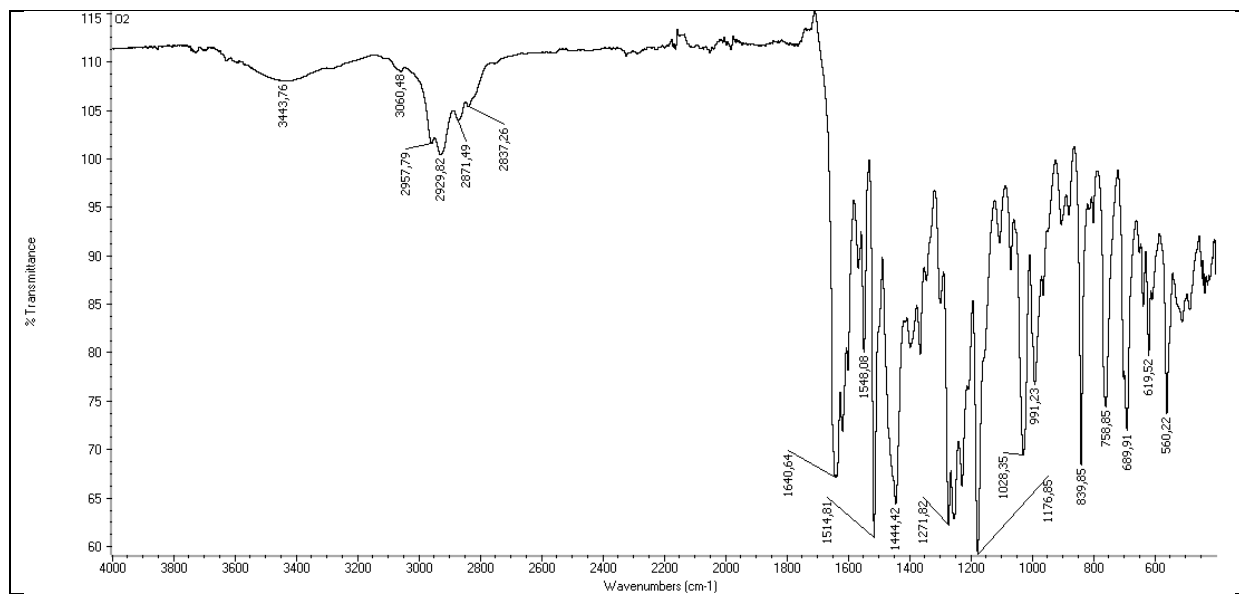

7c

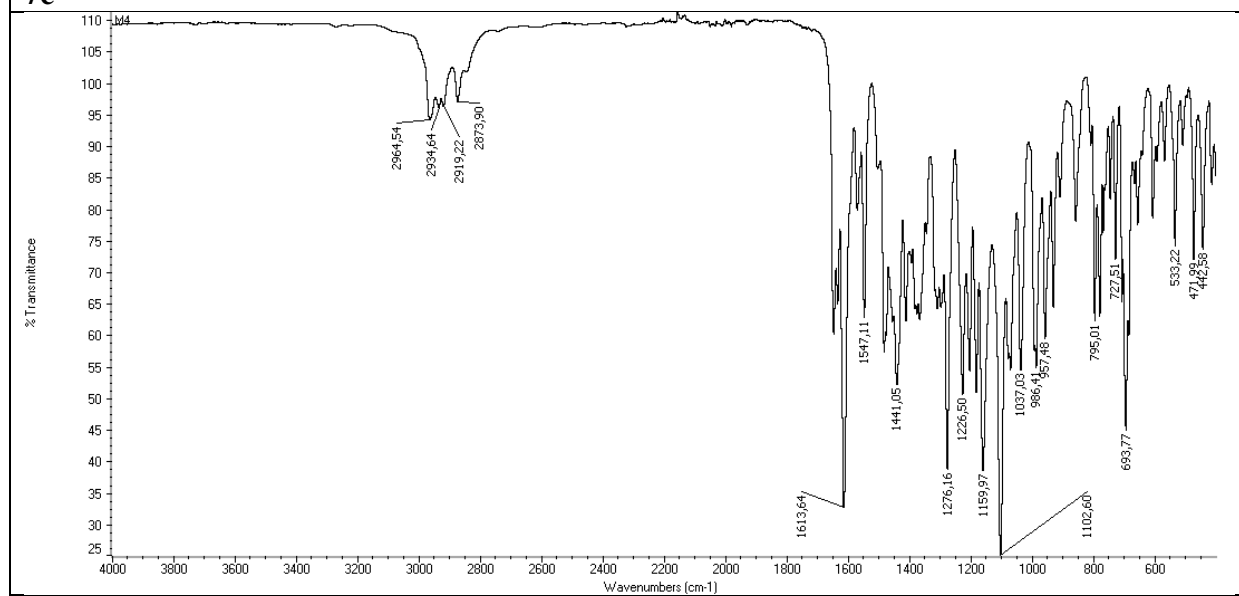

8a

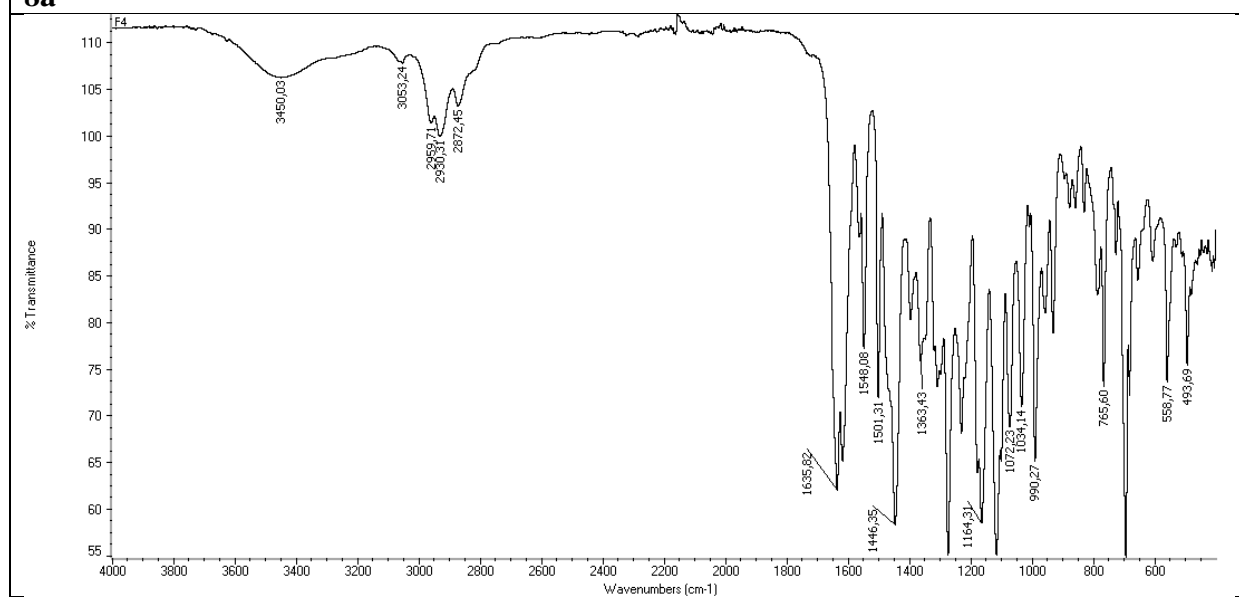

8b

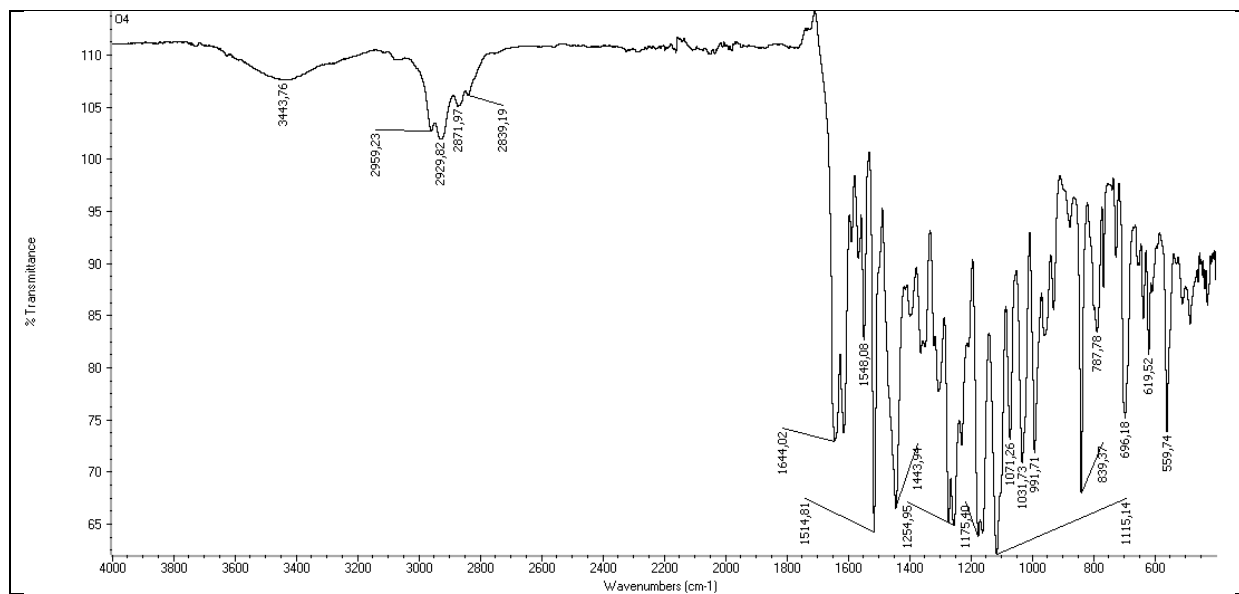

8c

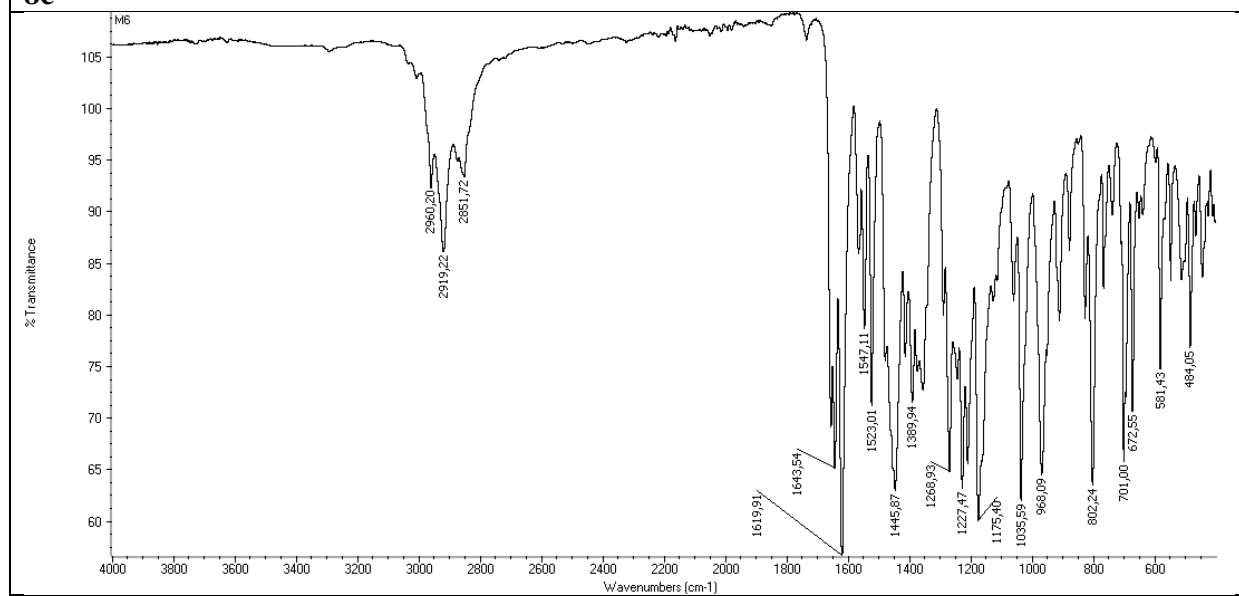

9a

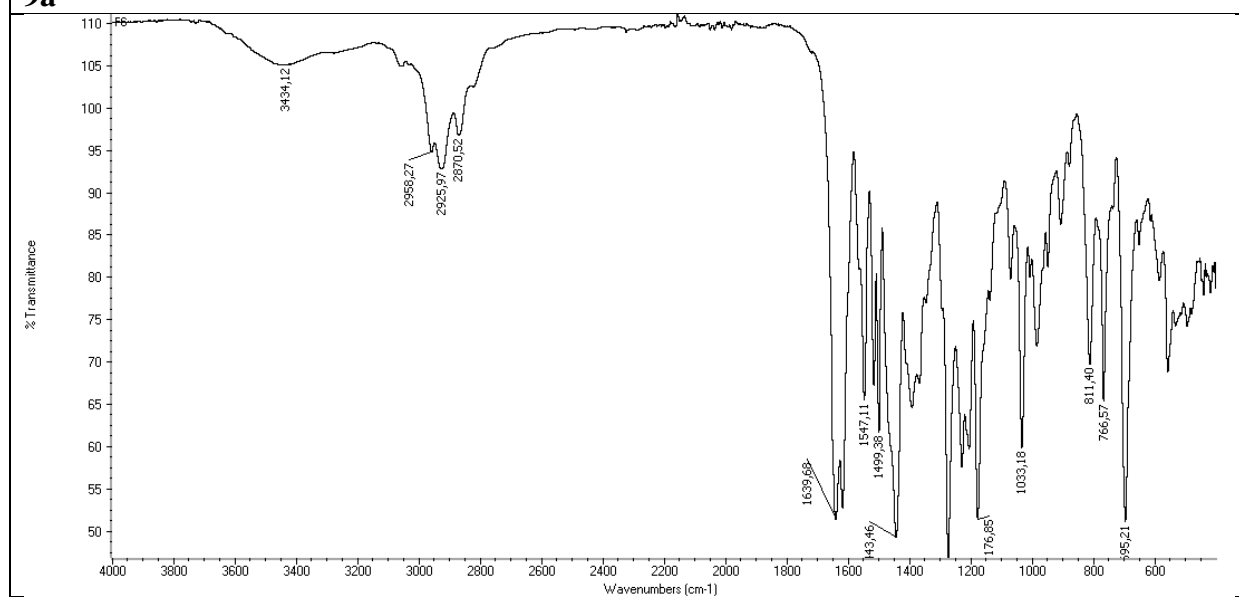

9b

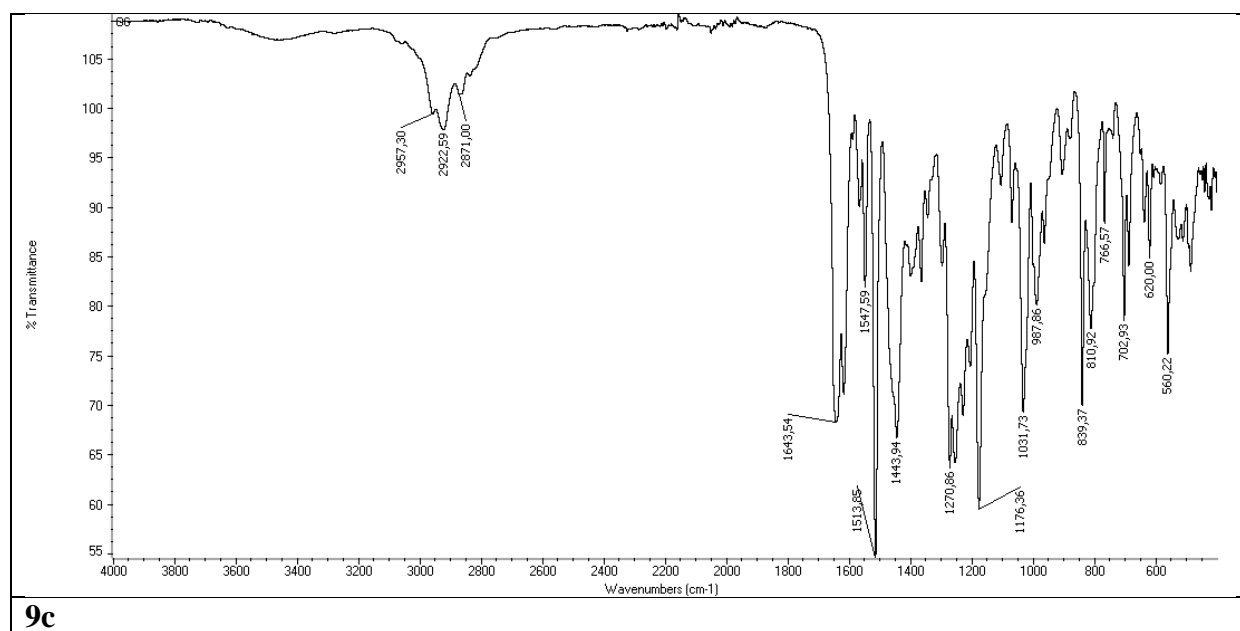

9c

**Table S5** – Molecular formula strings (CSV) of reported compounds

|           | SMILE                                                                                                 |
|-----------|-------------------------------------------------------------------------------------------------------|
| <b>2a</b> | <chem>CCCCn1c(c2c(c1C)c(=O)n(nc2OCC(=O)NNC(=S)NC)C)C</chem>                                           |
| <b>2b</b> | <chem>CCCCn1c(c2c(c1C)c(=O)n(nc2OCC(=O)NNC(=S)Nc3ccccc3)C)C</chem>                                    |
| <b>2c</b> | <chem>CCCCn1c(c2c(c1C)c(=O)n(nc2OCC(=O)NNC(=S)Nc3ccc(cc3)OC)C)C</chem>                                |
| <b>3a</b> | <chem>CCCCn1c(c2c(c1C)c(=O)n(nc2OCc3n[nH]c(=S)n3C)C)C</chem>                                          |
| <b>3b</b> | <chem>CCCCn1c(c2c(c1C)c(=O)n(nc2OCc3n[nH]c(=S)n3c4ccccc4)C)C</chem>                                   |
| <b>3c</b> | <chem>CCCCn1c(c2c(c1C)c(=O)n(nc2OCc3n[nH]c(=S)n3c4ccc(cc4)OC)C)C</chem>                               |
| <b>4a</b> | <chem>CCCCn1c(c2c(c1C)c(=O)n(nc2OCc3nn(c(=S)n3C)CN4CCN(CC4)c5ccccc5)C)C</chem>                        |
| <b>5a</b> | <chem>CCCCn1c(c2c(c1C)c(=O)n(nc2OCc3nn(c(=S)n3C)CN4CCN(CC4)c5cccc(c5)C(F)(F)F)C)C</chem>              |
| <b>6a</b> | <chem>CCCCn1c(c2c(c1C)c(=O)n(nc2OCc3nn(c(=S)n3C)CN4CCN(CC4)c5ccc(cc5)C)C)C</chem>                     |
| <b>7a</b> | <chem>CCCCn1c(c2c(c1C)c(=O)n(nc2OCc3nnc(n3C)SCC(=O)N4CCN(CC4)c5ccccc5)C)C</chem>                      |
| <b>8a</b> | <chem>CCCCn1c(c2c(c1C)c(=O)n(nc2OCc3nnc(n3C)SCC(=O)N4CCN(CC4)c5cccc(c5)C(F)(F)F)C)C</chem>            |
| <b>9a</b> | <chem>CCCCn1c(c2c(c1C)c(=O)n(nc2OCc3nnc(n3C)SCC(=O)N4CCN(CC4)c5ccc(cc5)C)C)C</chem>                   |
| <b>4b</b> | <chem>CCCCn1c(c2c(c1C)c(=O)n(nc2OCc3nn(c(=S)n3c4ccccc4)CN5CCN(CC5)c6ccccc6)C)C</chem>                 |
| <b>5b</b> | <chem>CCCCn1c(c2c(c1C)c(=O)n(nc2OCc3nn(c(=S)n3c4ccccc4)CN5CCN(CC5)c6cccc(c6)C(F)(F)F)C)C</chem>       |
| <b>6b</b> | <chem>CCCCn1c(c2c(c1C)c(=O)n(nc2OCc3nn(c(=S)n3c4ccccc4)CN5CCN(CC5)c6ccc(cc6)C)C)C</chem>              |
| <b>7b</b> | <chem>CCCCn1c(c2c(c1C)c(=O)n(nc2OCc3nnc(n3c4ccccc4)SCC(=O)N5CCN(CC5)c6ccccc6)C)C</chem>               |
| <b>8b</b> | <chem>CCCCn1c(c2c(c1C)c(=O)n(nc2OCc3nnc(n3c4ccccc4)SCC(=O)N5CCN(CC5)c6cccc(c6)C(F)(F)F)C)C</chem>     |
| <b>9b</b> | <chem>CCCCn1c(c2c(c1C)c(=O)n(nc2OCc3nnc(n3c4ccccc4)SCC(=O)N5CCN(CC5)c6ccc(cc6)C)C)C</chem>            |
| <b>4c</b> | <chem>CCCCn1c(c2c(c1C)c(=O)n(nc2OCc3nn(c(=S)n3c4ccc(cc4)OC)CN5CCN(CC5)c6ccccc6)C)C</chem>             |
| <b>5c</b> | <chem>CCCCn1c(c2c(c1C)c(=O)n(nc2OCc3nn(c(=S)n3c4ccc(cc4)OC)CN5CCN(CC5)c6cccc(c6)C(F)(F)F)C)C</chem>   |
| <b>6c</b> | <chem>CCCCn1c(c2c(c1C)c(=O)n(nc2OCc3nn(c(=S)n3c4ccc(cc4)OC)CN5CCN(CC5)c6ccc(cc6)C)C)C</chem>          |
| <b>7c</b> | <chem>CCCCn1c(c2c(c1C)c(=O)n(nc2OCc3nnc(n3c4ccc(cc4)OC)SCC(=O)N5CCN(CC5)c6ccccc6)C)C</chem>           |
| <b>8c</b> | <chem>CCCCn1c(c2c(c1C)c(=O)n(nc2OCc3nnc(n3c4ccc(cc4)OC)SCC(=O)N5CCN(CC5)c6cccc(c6)C(F)(F)F)C)C</chem> |
| <b>9c</b> | <chem>CCCCn1c(c2c(c1C)c(=O)n(nc2OCc3nnc(n3c4ccc(cc4)OC)SCC(=O)N5CCN(CC5)c6ccc(cc6)C)C)C</chem>        |



**Table S6** – CD spectra of BSA in the absence and presence of all analyzed compounds

BSA to analyzed compounds' molar ratios was changing from 1:0 to 1:10

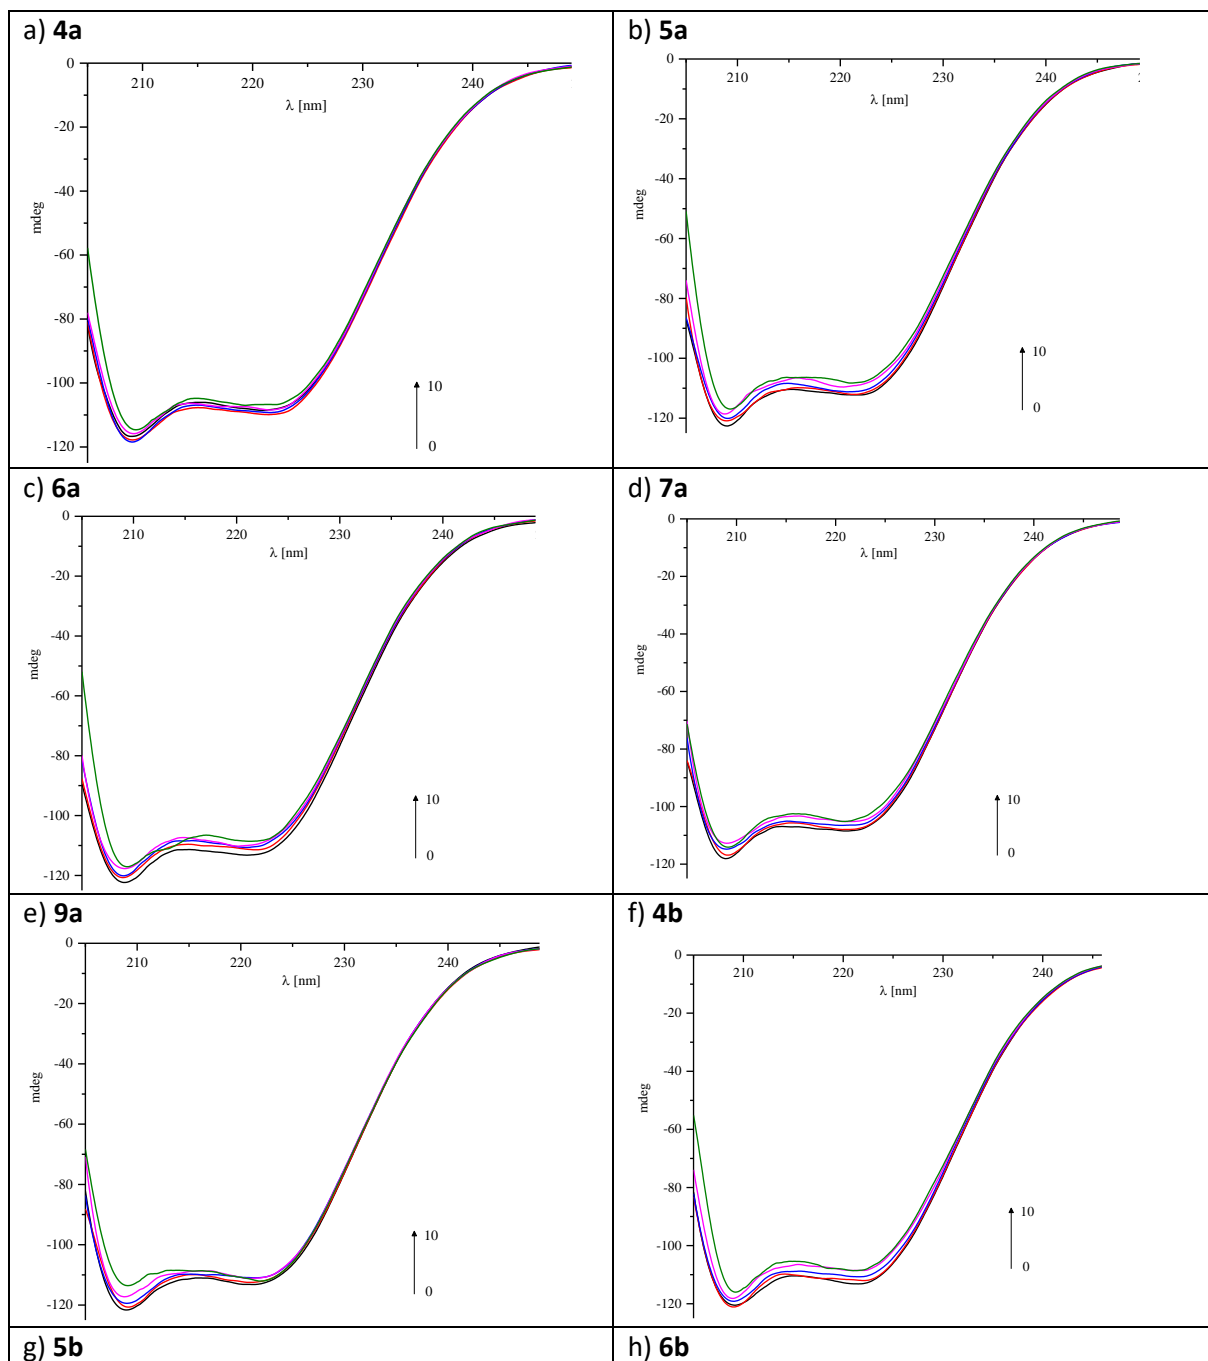

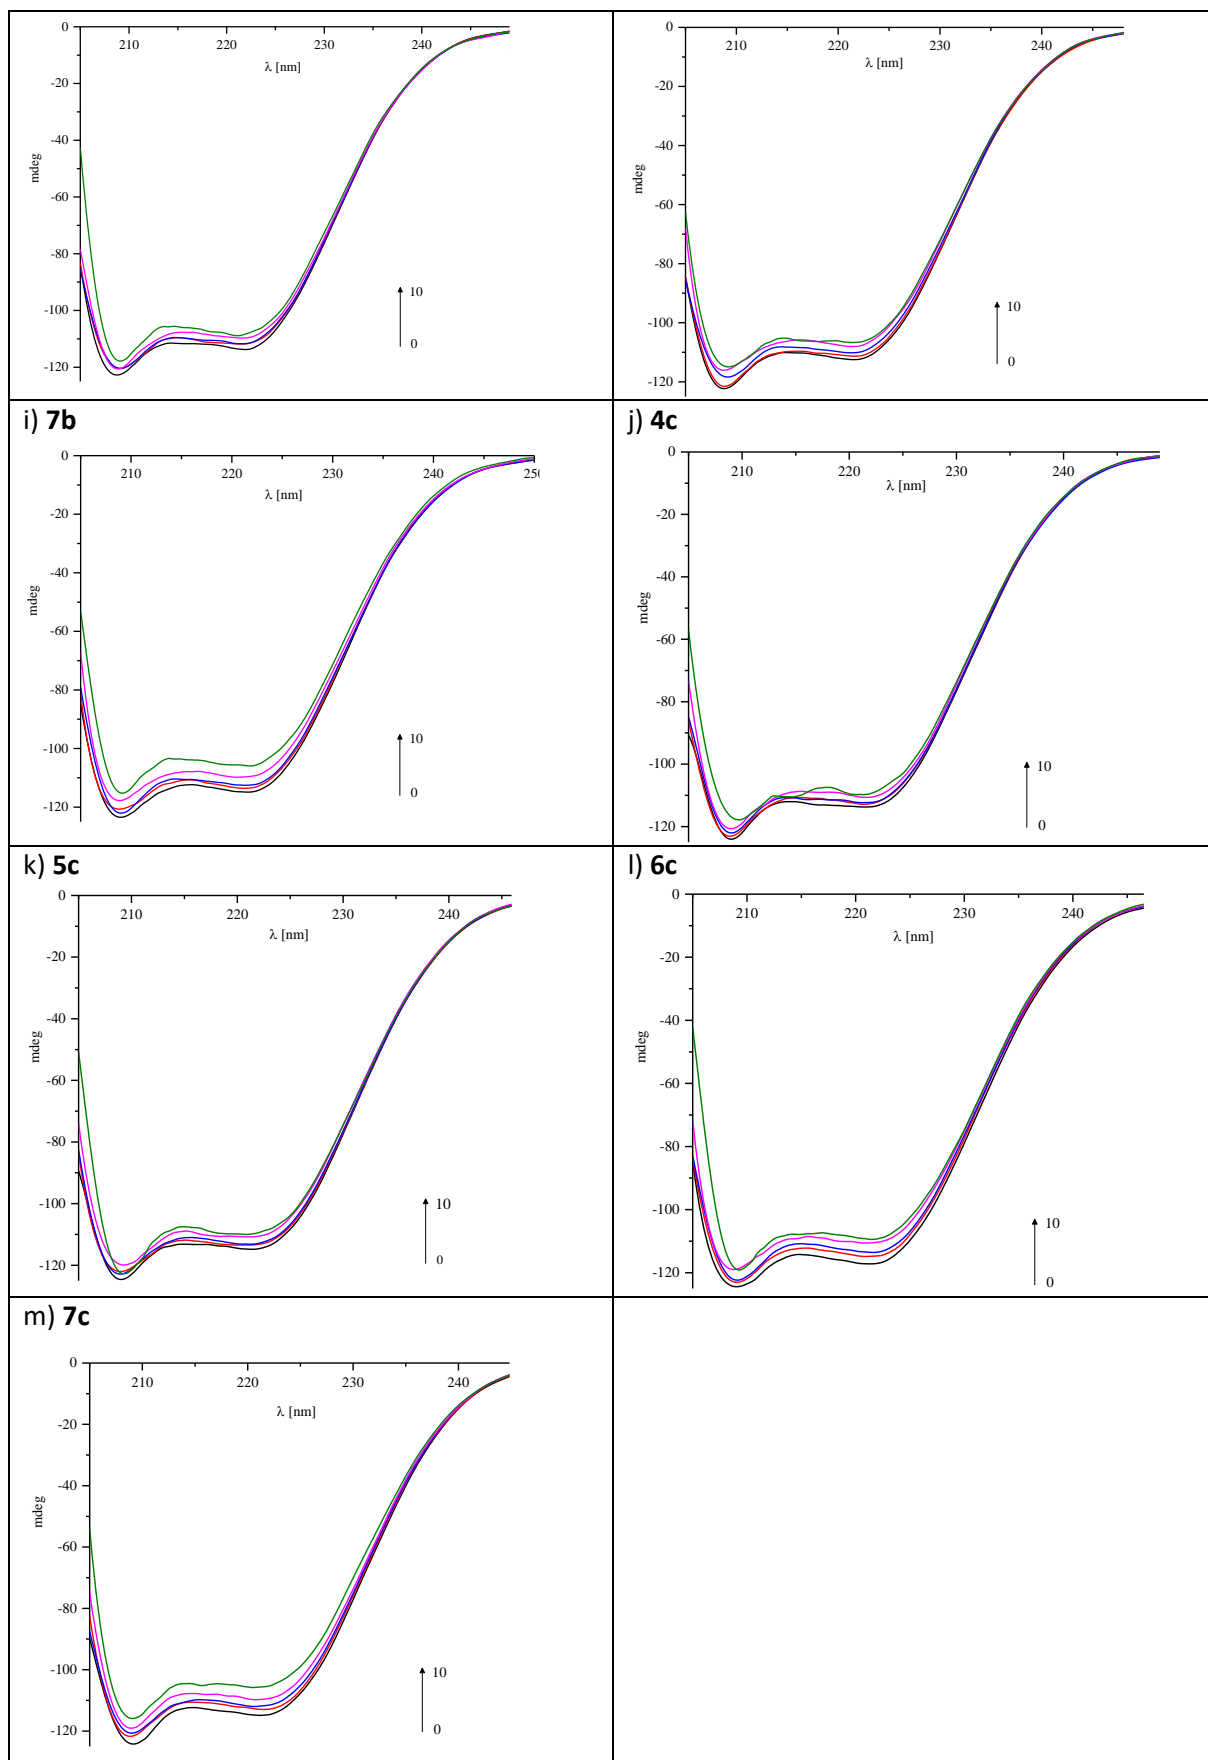

**Table S7 - FT-IR spectra - The curve-fitted Amide I region**

The curve-fitted Amide I region for a) free-BSA and equimolar complex samples: b) BSA-**4a**, c) BSA-**5a**, d) BSA-**6a**, e) BSA-**7a**, f) BSA-**9a**, g) BSA-**4b**, h) BSA-**5b**, i) BSA-**6b**, j) BSA-**7b**, k) BSA-**4c**, l) BSA-**5c**, m) BSA-**6c**, n) BSA-**7c**.

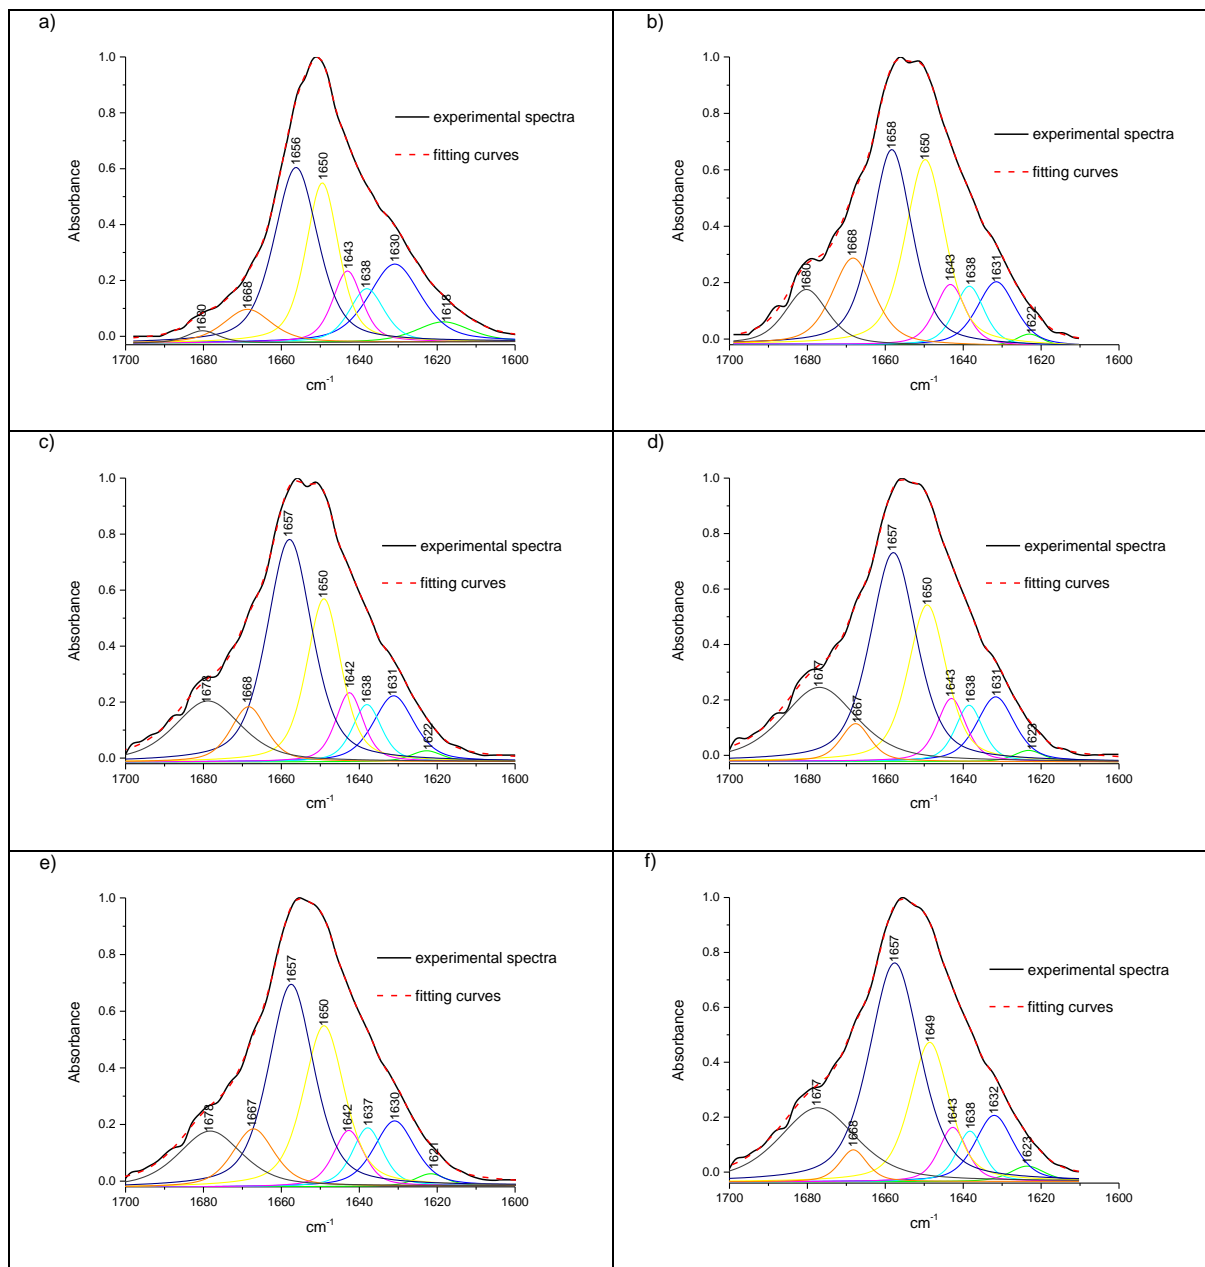

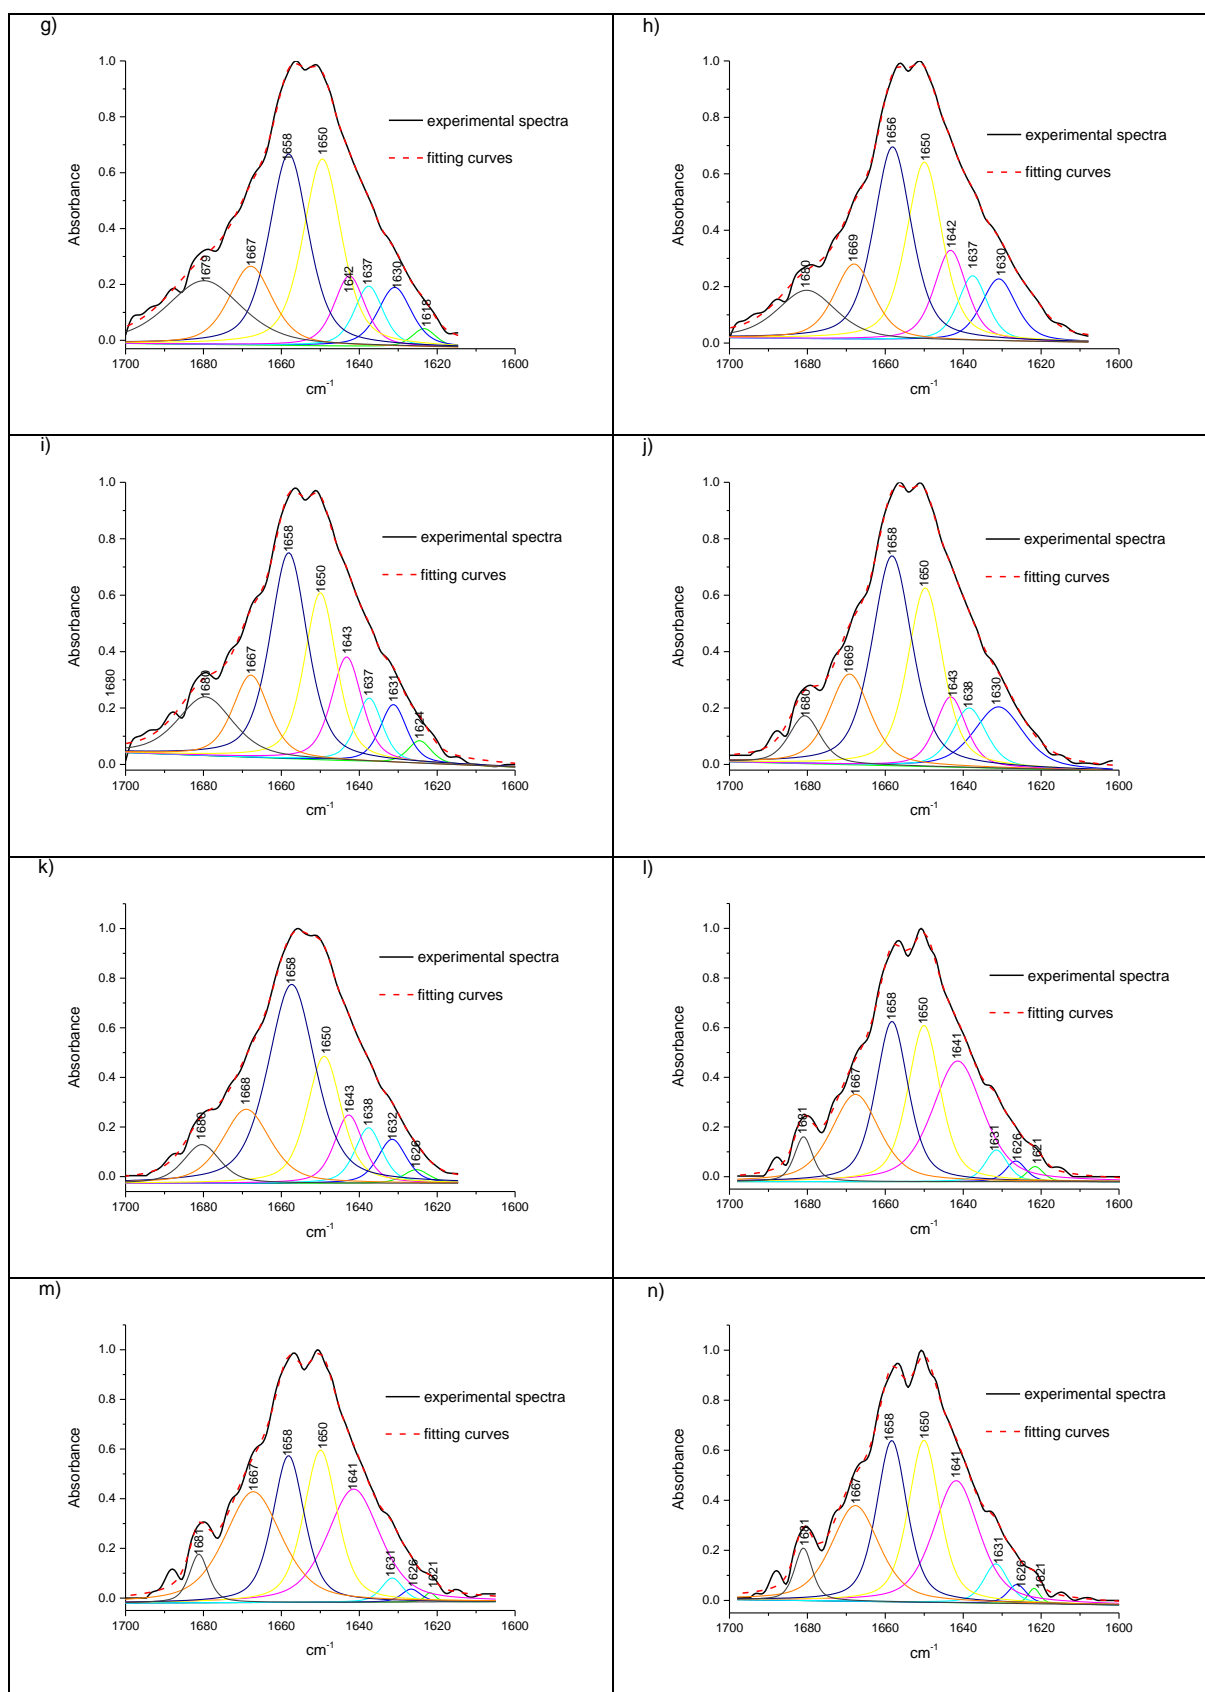

**Table S8 - FT-IR spectra – The changes in Amide I ( $1650\text{cm}^{-1}$ ) and Amide II ( $1545\text{cm}^{-1}$ ) band contribution by BSA interaction with analyzed compounds.**

a) **4a**, b) **5a**, c) **6a**, d) **7a**, e) **9a**, f) **4b**, g) **5b**, h) **6b**, i) **7b**, j) **4c**, k) **5c**, l) **6c**, m) **7c**.

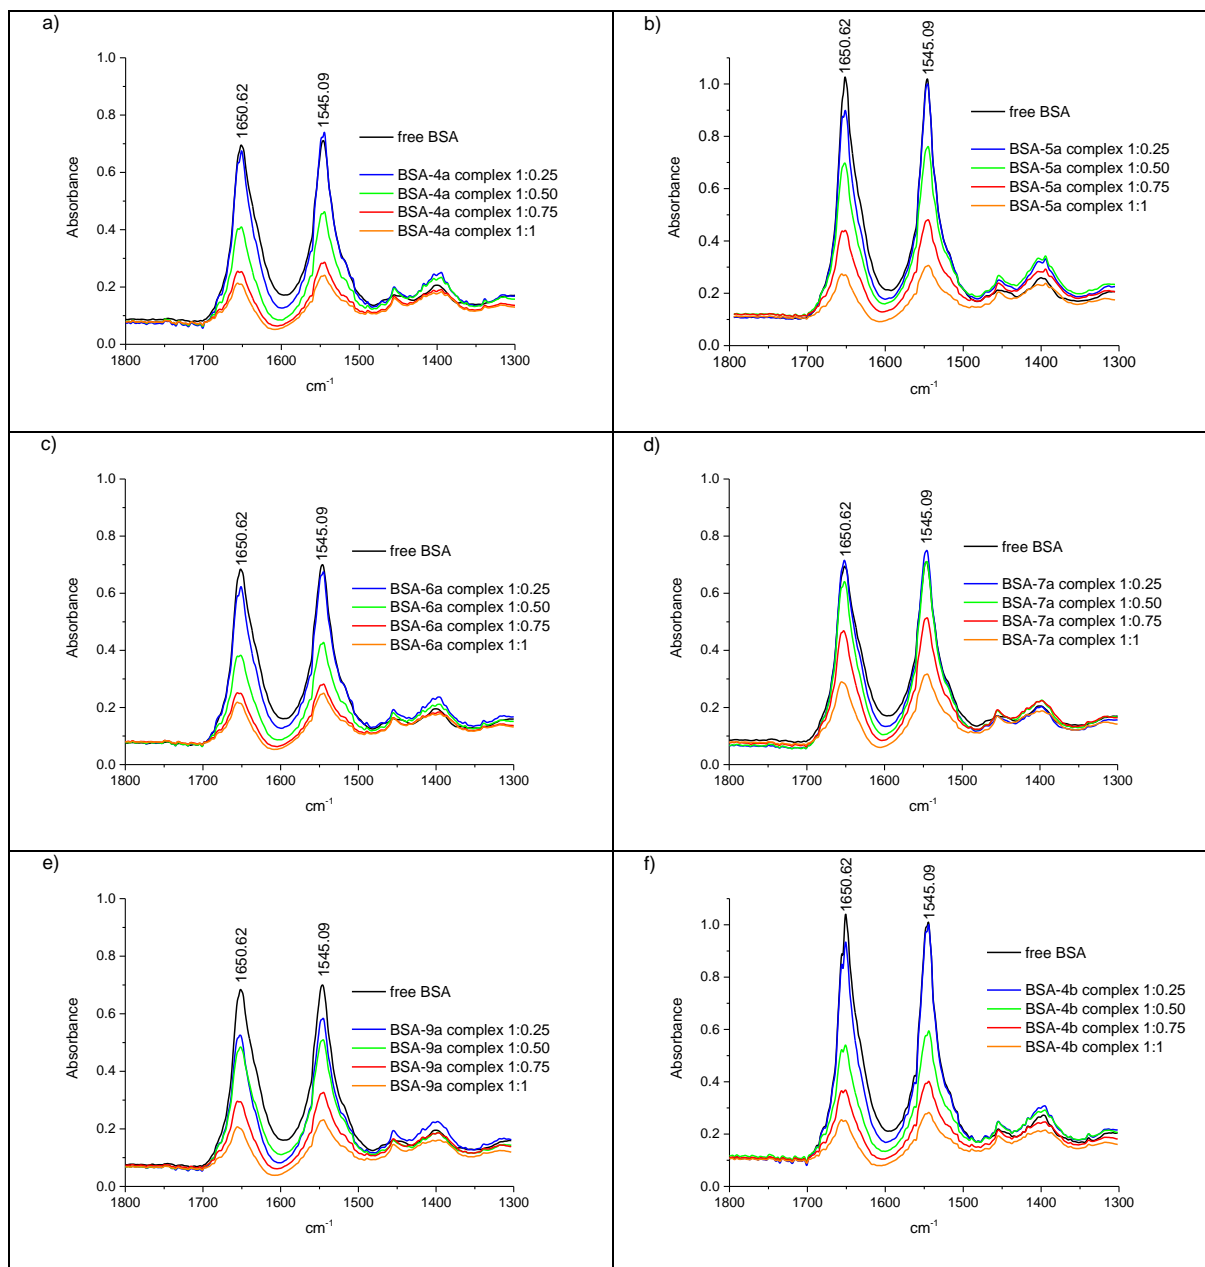

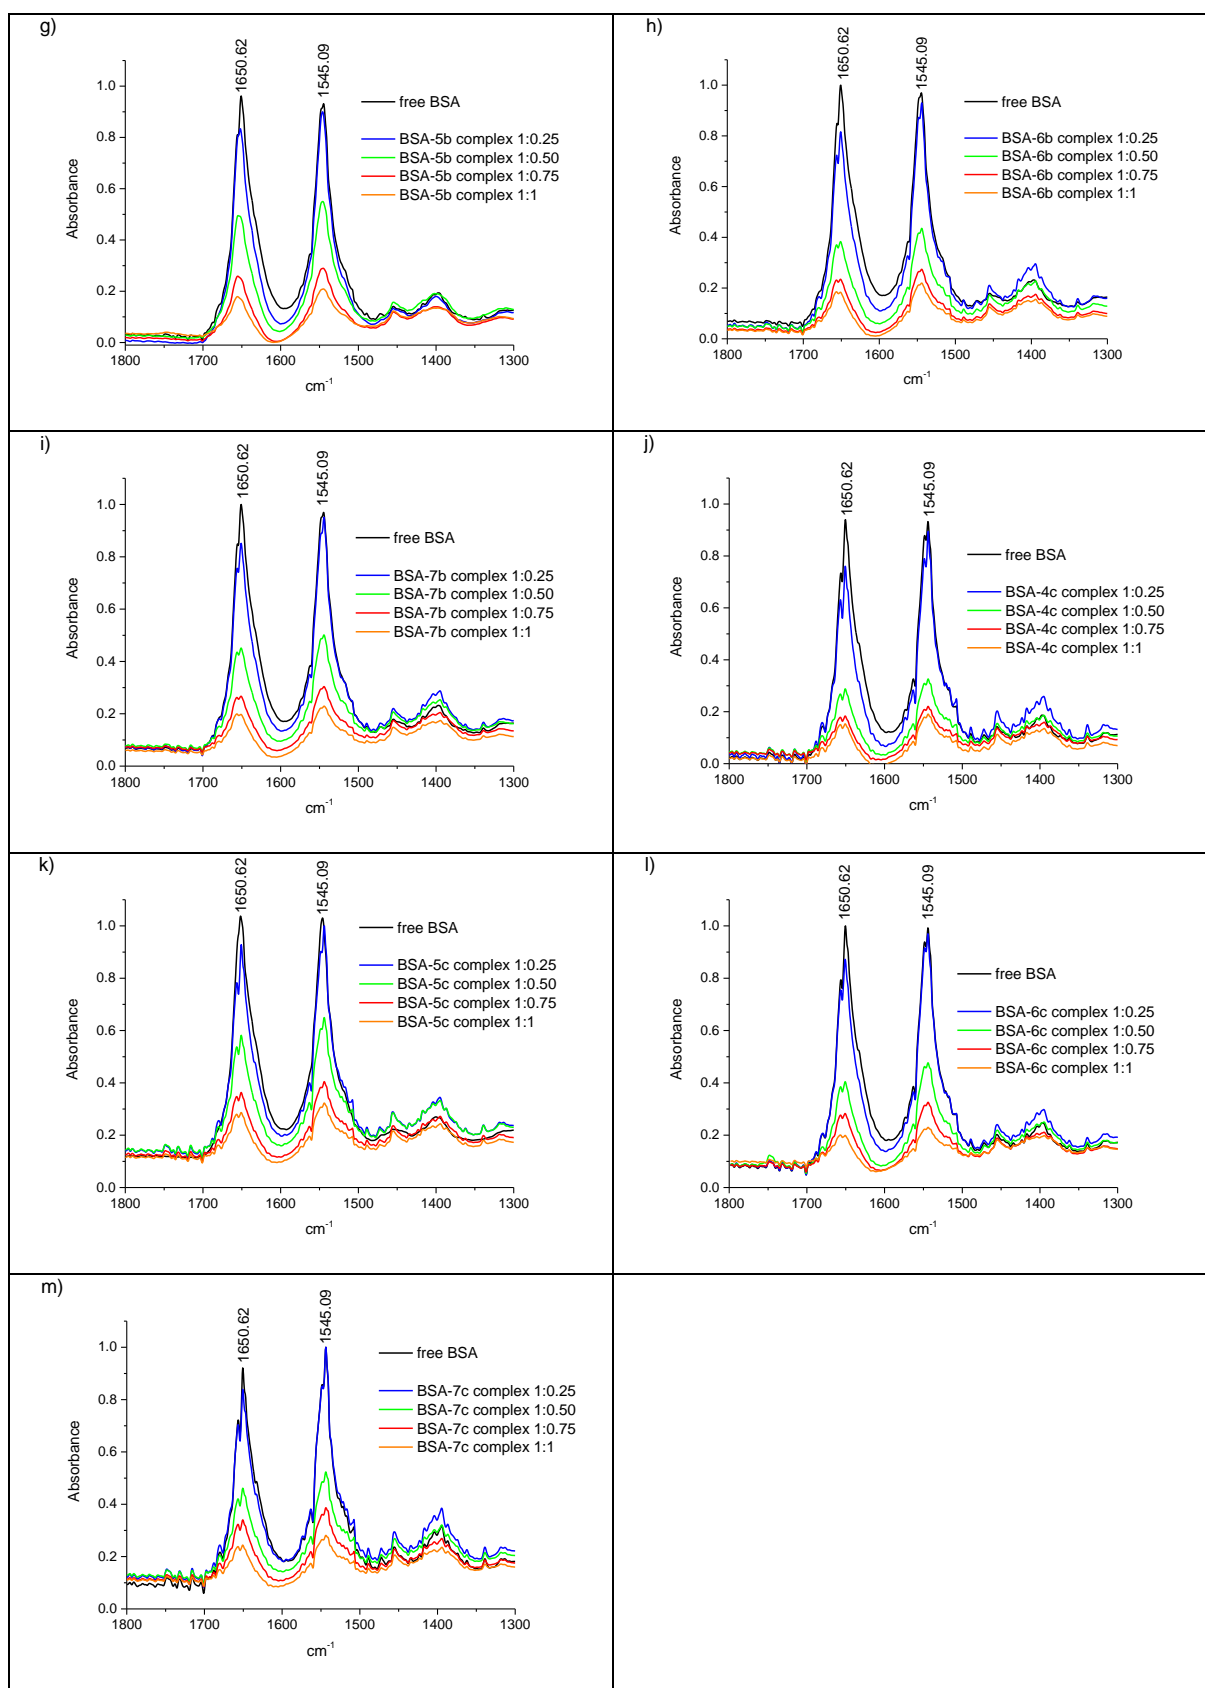

Supplement: s1 [file s1]
